# Supplementary material for: Thymic Epithelial Tumors phenotype relies on miR-145-5p epigenetic regulation
Source: Springer Nature journal article supplement (doi:10.1186/s12943-017-0655-2), 2017-05-10
Supplement: MOESM3 [file 12275152]

Figure S1

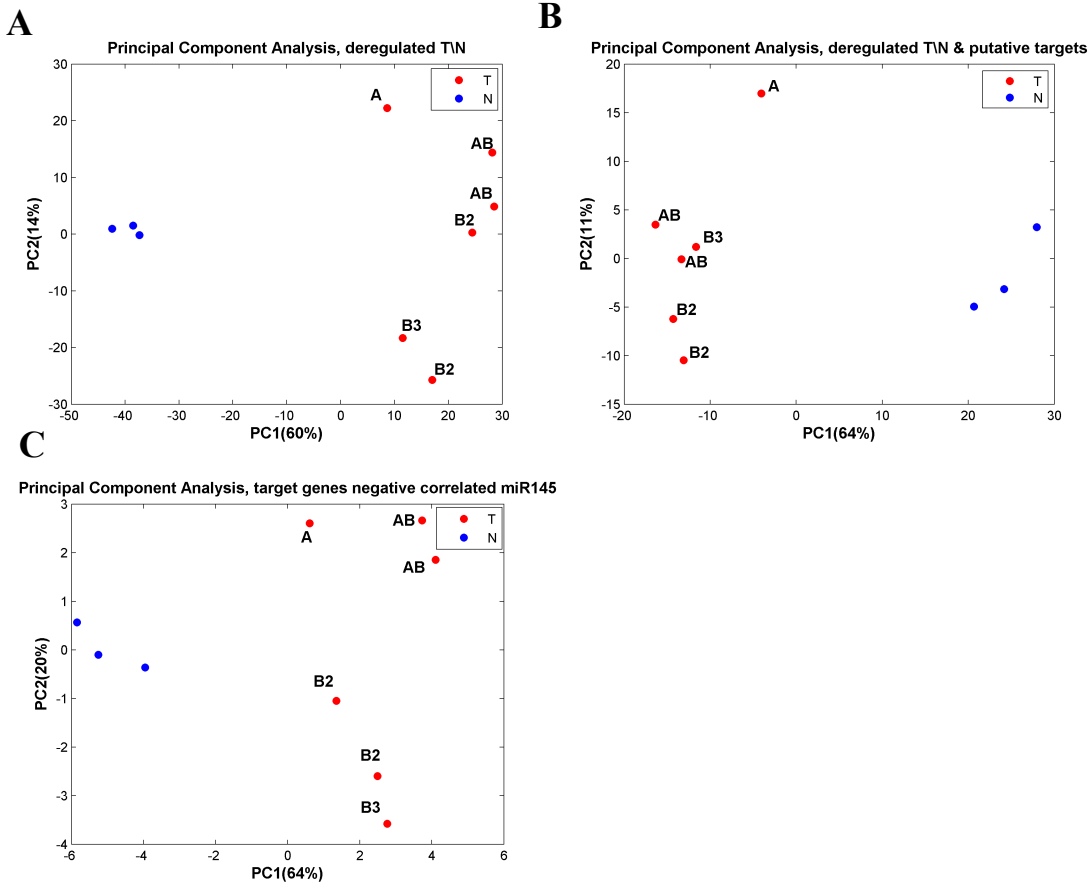

**Figure Legend: A-C)** Principal Component Analysis (PCA) of the gene expression data representing the distribution of samples. Each dot represents a sample and each color represents the type of the sample.
