# Supplementary material for: Thymic Epithelial Tumors phenotype relies on miR-145-5p epigenetic regulation
Source: Mol Cancer. 2017 May 10;16:88. doi: 10.1186/s12943-017-0655-2 (PMC5424390; doi:10.1186/s12943-017-0655-2)
Supplement: Supplementary file 2 — RNAs deregulated in 6 Tumor (T) versus 3 Normal (N) samples. (XLSX 256 kb) [file 12943_2017_655_MOESM2_ESM.xlsx]

## Sheet: Suppl Table 1
RNAs deregulated in 6 Tumor (T) versus 3 Normal (N) samples
p-value < 0,05
FDR= false discovery rate
		RNAs up-regulated in T versus N
		ID	gene	FDR	p-value T-test	median T	median N	log2 fold (T\N)
		16902690	LOC440905	0.204356	0.00401243	10.6694	5.32537	5.344
		16885596	POTEJ	0.251603	0.011191	10.7678	6.79727	3.97057
		17117884	CYP4F30P	0.291048	0.0212749	9.53237	5.71407	3.8183
		16885685	POTEE	0.265981	0.0138652	10.8154	7.11843	3.69694
		16789869	POTEM	0.239415	0.00954595	9.9377	6.28755	3.65015
		16902703	POTEF	0.240104	0.0070462	9.94589	6.43607	3.50982
		16709553	ATRNL1	0.180539	3.46012e-05	9.41171	6.01235	3.39936
		16780151	MIR4500	0.335382	0.0388433	6.19366	3.34371	2.84995
		16805901	POTEB2	0.274724	0.0168388	8.30441	5.49478	2.80963
		17078388	OTTHUMG00000164547	0.322148	0.031191	7.09135	4.37796	2.71339
		16849697	NPTX1	0.219035	0.00420469	9.93638	7.31256	2.62382
		16801065	OTTHUMG00000172467	0.337517	0.0346857	5.78663	3.16952	2.61711
		16885705	LOC440910	0.261161	0.0152067	8.45795	5.88349	2.57446
		16928329	BCRP3	0.350456	0.0361262	8.31962	5.85395	2.46567
		16882493	ANAPC1P1	0.221917	0.00375199	10.7835	8.45353	2.32992
		16737715	CHRM4	0.173299	0.00200046	9.4601	7.13762	2.32248
		17061759	NRCAM	0.189113	0.00155355	8.4633	6.23699	2.22632
		17095503	LOC440173	0.357261	0.0456155	7.21777	4.9983	2.21946
		16800536	DUOX1	0.175047	0.000888187	8.73793	6.556	2.18194
		16998588	LINC00491	0.247728	0.0132023	7.17196	4.99956	2.1724
		16982183	SORBS2	0.187545	0.00064466	10.0664	7.89613	2.17032
		17114272	GPC4	0.178102	0.000408364	10.1793	8.06396	2.11537
		17091877	TUBBP5	0.2412	0.00639969	6.95738	4.88262	2.07476
		16911995	PAX1	0.170279	0.00166368	11.3805	9.31867	2.06187
		16983738	OTTHUMG00000162518	0.211594	0.0028313	8.08568	6.02939	2.05629
		17117619	LOC100507460	0.291368	0.0169454	7.31372	5.25822	2.0555
		16728506	KRTAP5-8	0.281187	0.0163287	8.46694	6.41373	2.05321
		16679777	OR2L2	0.259834	0.0146151	7.93855	5.91719	2.02136
		16767020	C12orf56	0.299345	0.026707	8.14859	6.15702	1.99157
		16885781	POTEKP	0.281574	0.0175234	9.03298	7.05453	1.97845
		16976891	LOC100505946	0.22444	0.0156462	8.31152	6.36966	1.94186
		16826230	NETO2	0.247811	0.0114495	9.44335	7.51384	1.92951
		16931864	POTEH	0.344805	0.030885	7.74475	5.81977	1.92498
		16968122	FRAS1	0.277434	0.0132919	9.16058	7.23675	1.92383
		16832499	FOXN1	0.181727	0.000107072	9.77884	7.91815	1.86068
		16813922	PCSK6	0.176583	0.00229985	9.2198	7.36771	1.85209
		16951142	COL6A4P1	0.186478	0.00314559	7.9183	6.07617	1.84213
		16902683	LOC100131320	0.292752	0.0378402	7.62002	5.78764	1.83238
		16714725	TMEM26	0.244435	0.00666561	8.00222	6.18117	1.82105
		17083357	CD274	0.327969	0.0347549	9.29005	7.50469	1.78535
		16675763	PKP1	0.177311	0.000648244	9.46226	7.67927	1.78299
		16730429	ARHGAP42	0.177672	0.00386803	10.3474	8.56711	1.78032
		16910341	PASK	0.209846	0.00270691	9.87968	8.10528	1.7744
		16679766	OR2AK2	0.323702	0.0438319	6.42728	4.67052	1.75677
		16985491	MAST4-IT1	0.230258	0.00662341	6.81009	5.06526	1.74483
		16750974	AQP5	0.289536	0.0206325	9.15251	7.43374	1.71877
		16857842	CCL25	0.263866	0.0358639	12.376	10.6786	1.69737
		17095194	RASEF	0.209523	0.00266799	8.12401	6.42896	1.69504
		17003407	LOC100507387	0.179696	0.00124651	7.0508	5.35668	1.69412
		17063948	EPHA1	0.204363	0.00317016	9.53521	7.8462	1.68901
		16979825	PABPC4L	0.335804	0.0288396	8.96182	7.27437	1.68745
		16873513	LOC400706	0.192065	0.00230641	6.76121	5.07394	1.68727
		17021116	OTTHUMG00000015101	0.356885	0.0455584	6.2896	4.60282	1.68678
		16691414	IGSF3	0.171785	0.000243757	9.18692	7.51275	1.67418
		17052973	CNTNAP2	0.348605	0.0404641	7.43479	5.76543	1.66937
		16798406	SNORD115-31	0.348511	0.0330562	6.21189	4.55633	1.65556
		16921498	POTED	0.299841	0.035999	6.72468	5.10749	1.61719
		17031045	C4B	0.194682	0.00057026	10.7809	9.16664	1.61422
		16983732	OTTHUMG00000162179	0.211686	0.00485621	8.14594	6.53936	1.60658
		17004612	DSP	0.184866	0.00377922	11.6572	10.0661	1.59111
		16995809	OXCT1	0.190409	0.00618865	10.4419	8.85207	1.58984
		16781285	GAS6	0.2296	0.00699513	10.1741	8.5846	1.58953
		16793623	SIX4	0.176272	0.00199105	8.24597	6.6678	1.57817
		16919703	PLTP	0.177809	0.00152365	13.1165	11.5445	1.57192
		17069402	UG0898H09	0.376011	0.0414908	6.84974	5.28048	1.56925
		17007048	C4A	0.193186	0.000549842	10.734	9.17229	1.5617
		16994618	MYO10	0.221657	0.0050651	9.35921	7.79927	1.55994
		16711394	CALML3-AS1	0.194742	0.00358292	7.59285	6.03991	1.55294
		17002396	C5orf54	0.162625	0.00130106	6.65279	5.09991	1.55287
		16661636	RAB42	0.35418	0.0372998	8.27563	6.72334	1.55229
		16699643	SUSD4	0.282074	0.0200891	8.41507	6.86318	1.55189
		17009760	FAM83B	0.208328	0.00339744	9.00184	7.45052	1.55132
		16983736	OTTHUMG00000162516	0.244833	0.00899261	6.59201	5.05213	1.53988
		17024118	IL20RA	0.243544	0.00709737	7.34902	5.81545	1.53357
		17117843	TOMM40	0.259852	0.0128375	9.1942	7.66099	1.53321
		16798432	SNORD115-44	0.328957	0.0264721	9.19319	7.6601	1.53309
		16919351	PTPRT	0.173854	0.000335331	9.68559	8.15296	1.53264
		17080188	SYBU	0.224767	0.00509741	8.06348	6.53615	1.52733
		16911382	LAMP5	0.244129	0.00722317	7.98141	6.45674	1.52467
		17068720	PTCH1	0.391488	0.0485158	6.77302	5.25001	1.52301
		16688615	SLC44A5	0.358498	0.0356508	7.55811	6.03521	1.5229
		16967202	LPHN3	0.196698	0.00228832	8.30695	6.7859	1.52105
		17086193	PSAT1	0.229985	0.0239232	9.75804	8.24315	1.51489
		16793585	C14orf39	0.318018	0.0301211	6.06921	4.55495	1.51426
		16854437	CDH2	0.356896	0.0355372	8.46652	6.9564	1.51012
		16968468	CDS1	0.192147	0.0017744	8.53679	7.02874	1.50805
		16679764	OR2L8	0.240163	0.00633784	8.56176	7.05707	1.5047
		17048083	STEAP2	0.252486	0.0199705	9.77912	8.27605	1.50307
		16730467	TMEM133	0.191843	0.00168983	10.0002	8.49905	1.50111
		16689020	MCOLN3	0.215244	0.00458255	8.87999	7.38311	1.49688
		16999943	FSTL4	0.260141	0.00974315	7.5633	6.06763	1.49567
		16873145	LOC100379224	0.179231	0.00138054	7.30199	5.81075	1.49124
		16949562	MIR944	0.177009	0.000826324	4.69573	3.21125	1.48448
		16798345	SNORD115-22	0.304403	0.0198459	9.24989	7.77714	1.47275
		16693482	S100A14	0.163392	0.0002046	10.2844	8.81223	1.47213
		17043613	LOC100505938	0.35377	0.0452132	6.56507	5.09424	1.47083
		16674440	FAM163A	0.185555	0.00229144	9.75913	8.29168	1.46745
		16998567	SLCO6A1	0.228833	0.0094456	6.46942	5.00947	1.45995
		16718263	SORCS1	0.179198	0.00120072	7.33063	5.87304	1.45759
		16798430	SNORD115-11	0.30985	0.0212391	9.42829	7.97791	1.45038
		16798270	SNORD115-12	0.310574	0.0212391	9.42829	7.97791	1.45038
		17109680	MAP7D2	0.224171	0.00544446	7.66083	6.21911	1.44172
		16906835	PGAP1	0.19237	0.0017514	9.51148	8.07039	1.44109
		17063394	KIAA1549	0.295932	0.0205431	9.12721	7.69594	1.43127
		16783473	PAX9	0.221769	0.00689359	9.75973	8.34639	1.41334
		17107492	SLITRK2	0.270429	0.0195624	7.10931	5.69703	1.41228
		17096394	OTTHUMG00000020335	0.299116	0.0179105	6.55164	5.14394	1.40769
		16873174	ZNF229	0.289535	0.0153908	7.022	5.61729	1.4047
		16805460	OTTHUMG00000172035	0.344792	0.0377084	4.76037	3.35657	1.4038
		17072979	KHDRBS3	0.228861	0.00525982	7.90706	6.51035	1.39671
		16776961	LOC100506394	0.229583	0.00860602	7.22394	5.8407	1.38324
		16802795	NEO1	0.285818	0.0269805	10.2231	8.84023	1.38292
		16672435	FCER1A	0.255215	0.00911398	8.12316	6.74524	1.37792
		16734650	OTTHUMG00000166987	0.272781	0.0173525	8.09046	6.72104	1.36942
		16898911	CYP26B1	0.185858	0.00130658	8.59776	7.22918	1.36858
		17030967	STK19	0.175035	0.000793349	10.0868	8.72266	1.36414
		17108959	KAL1	0.248319	0.0137356	9.572	8.21474	1.35726
		16667346	SLC44A3	0.358713	0.0419044	7.67011	6.32845	1.34166
		16798428	SNORD115-42	0.3319	0.0284345	9.27732	7.93758	1.33974
		16793613	SIX1	0.259254	0.0118803	6.72213	5.3909	1.33123
		16855244	MIR4320	0.377125	0.049472	6.20039	4.87537	1.32502
		16825970	PRSS8	0.230217	0.00688146	9.95515	8.631	1.32415
		16798422	SNORD115-39	0.322924	0.0254511	9.4374	8.1167	1.3207
		17008404	APOBEC2	0.244302	0.0112639	8.79298	7.47253	1.32045
		16962632	LEPREL1	0.307127	0.0196242	8.25618	6.93836	1.31782
		16850806	SOGA2	0.16734	0.000943167	8.65427	7.34357	1.3107
		16782980	C14orf23	0.32175	0.0336415	8.49144	7.18335	1.30809
		17085139	OTTHUMG00000066698	0.192071	0.00171193	9.26589	7.96129	1.3046
		16798341	SNORD115-20	0.358708	0.0401603	8.86889	7.56729	1.3016
		16808609	DUOXA1	0.193602	0.00219041	8.26125	6.96301	1.29823
		16917061	FERMT1	0.207165	0.00269627	8.60403	7.31355	1.29048
		17118138	LOC100129233	0.298131	0.0215796	7.87666	6.60548	1.27118
		16842618	SLC46A1	0.176591	0.000990211	9.56247	8.29199	1.27048
		16708260	LINC00263	0.263907	0.0123831	7.07406	5.81106	1.263
		16793999	PLEK2	0.18898	0.00206661	9.70086	8.43874	1.26211
		16723318	PRRG4	0.187952	0.0102749	9.10296	7.84088	1.26208
		16702068	CALML3	0.289452	0.0190986	11.0054	9.74841	1.25702
		16798339	SNORD115-17	0.355473	0.036001	7.48068	6.2237	1.25698
		16703289	PRINS	0.310078	0.0286743	8.82428	7.58353	1.24075
		16679759	OR2L13	0.252056	0.0137795	7.07964	5.84048	1.23917
		16986891	OTTHUMG00000162559	0.340057	0.0338399	6.29335	5.05612	1.23723
		16798333	SNORD115-1	0.355665	0.0364309	9.2853	8.05109	1.23421
		17098504	SNORA65	0.35622	0.0374899	8.8655	7.63622	1.22928
		16984689	ITGA2	0.277158	0.0230127	9.4317	8.20451	1.22719
		17100075	HCCAT4	0.258413	0.0120171	7.25919	6.03242	1.22677
		16788570	SNORD113-1	0.387381	0.0473663	4.87961	3.6569	1.22271
		17095423	GOLM1	0.174899	0.000726685	9.43208	8.22443	1.20765
		16973465	RNF212	0.254157	0.0116285	7.86807	6.66288	1.20519
		16890675	IGFBP2	0.222016	0.00520585	8.50814	7.30409	1.20405
		16783751	OTTHUMG00000170702	0.237522	0.00693653	5.43149	4.22969	1.2018
		16683268	LOC100996511	0.181884	0.00296646	9.56988	8.36988	1.19999
		16971272	EDNRA	0.363299	0.0377925	10.3306	9.14275	1.18785
		16830220	ALOX12P2	0.16406	0.00025737	8.54592	7.36226	1.18366
		16969495	NPNT	0.192333	0.00176484	8.91594	7.7342	1.18175
		17086871	WNK2	0.281019	0.0173255	8.94556	7.76705	1.17851
		16820486	CDH1	0.340064	0.0289551	11.046	9.87043	1.17561
		16868797	AP1M2	0.223841	0.0253765	7.37073	6.2047	1.16602
		16694701	CRABP2	0.342332	0.0456919	8.20478	7.03924	1.16554
		17118076	LOC100128340	0.299412	0.0174245	9.86098	8.69574	1.16525
		16670072	LOC100505794	0.205998	0.00239276	9.15238	7.98967	1.16271
		16684385	SNORD103A	0.280988	0.0160132	7.46369	6.3088	1.15489
		17077191	LOC100507516	0.375514	0.0455953	10.8243	9.67007	1.15421
		17109545	GPR64	0.280765	0.0163458	8.5327	7.3788	1.15389
		16798134	LOC100506948	0.170873	0.00195817	8.64105	7.49003	1.15102
		16705810	UNC5B	0.163	0.000211414	8.87332	7.72846	1.14486
		16692603	HIST2H2BF	0.302009	0.0198254	6.73579	5.59498	1.14081
		17090190	NCS1	0.290894	0.0169039	8.97243	7.83286	1.13957
		16713309	FZD8	0.327542	0.0278481	8.64051	7.50412	1.13639
		16970536	HSPA4L	0.217364	0.00358483	9.28788	8.15405	1.13383
		16861596	LOC644554	0.280841	0.0183415	6.38006	5.24836	1.1317
		17073754	SCXA	0.255339	0.00888918	9.13727	8.00994	1.12733
		17070949	ESRP1	0.239498	0.00958191	8.3567	7.23104	1.12566
		16838750	BAIAP2	0.240568	0.0089273	8.8002	7.67512	1.12508
		16885153	GLI2	0.21581	0.003112	8.72263	7.60034	1.12229
		17083117	DMRT2	0.362172	0.0376998	9.40488	8.28414	1.12074
		16757603	LINC00173	0.303135	0.0218702	8.966	7.847	1.119
		16818501	LOC653562	0.247793	0.00742121	8.80856	7.69006	1.11849
		16969766	ENPEP	0.304405	0.023057	8.9442	7.83688	1.10733
		16854792	LINC00669	0.320364	0.0245411	7.56536	6.45837	1.10699
		17047918	CROT	0.192718	0.000537297	8.81555	7.70871	1.10684
		16908685	GLB1L	0.179173	0.000533563	8.10846	7.00516	1.10329
		16855196	MYO5B	0.318329	0.0229319	8.35281	7.251	1.10181
		16927082	SEPT5-GP1BB	0.194564	0.00449278	8.92072	7.8216	1.09913
		17082892	LOC100130027	0.261904	0.0148698	7.95426	6.86064	1.09361
		16785606	MPP5	0.232871	0.00564959	8.75126	7.66088	1.09038
		16881242	OR7E91P	0.221765	0.00442325	8.39504	7.31103	1.08401
		17069865	SLCO5A1	0.191998	0.00808541	6.82846	5.74557	1.0829
		16996146	ESM1	0.248047	0.00794827	7.17386	6.09138	1.08247
		16998007	CETN3	0.221199	0.0226001	7.34184	6.26408	1.07776
		16977396	SCD5	0.180392	0.00140786	9.00933	7.93989	1.06943
		16826552	RPGRIP1L	0.200027	0.00214359	7.44503	6.37617	1.06886
		17016545	ZSCAN31	0.319625	0.0270314	6.54974	5.48199	1.06775
		16798440	SNORD109A	0.288093	0.0266445	9.27958	8.21287	1.06671
		16899378	M1AP	0.263418	0.0173792	7.73914	6.6842	1.05494
		16784760	DACT1	0.318728	0.0417024	7.30505	6.25276	1.05228
		16761495	TAS2R10	0.183499	0.000626203	7.90375	6.85169	1.05206
		16705156	OTTHUMG00000164644	0.26393	0.0113276	5.68414	4.63215	1.05199
		16899413	EVA1A	0.163117	0.000322953	7.04374	5.99229	1.05145
		16703112	LOC100130992	0.345083	0.0393126	7.27923	6.22822	1.05101
		17111725	EDA2R	0.24287	0.0249281	8.15167	7.10177	1.0499
		16977537	HPSE	0.3046	0.0293045	7.30228	6.25502	1.04726
		16754563	MIR1252	0.358138	0.0421709	3.77673	2.73057	1.04617
		16827833	MTSS1L	0.251711	0.00835873	9.42789	8.3844	1.04349
		16907546	GCSHP3	0.178519	0.00119625	8.41519	7.38185	1.03334
		16800989	MIR4712	0.372659	0.0493701	3.88813	2.85621	1.03193
		16896561	CYP1B1	0.31269	0.0212014	9.53836	8.50736	1.031
		16780859	EFNB2	0.358168	0.0361871	8.87657	7.84558	1.03098
		16666509	IFI44	0.390212	0.0489623	9.72583	8.69488	1.03095
		16714618	ANK3	0.216244	0.0031967	9.05495	8.02581	1.02914
		16940211	TDGF1	0.317527	0.0215468	6.05864	5.02974	1.02891
		16926111	CBS	0.163339	0.000122591	8.16465	7.13692	1.02773
		17004194	FOXQ1	0.241318	0.00821268	7.48921	6.4621	1.02711
		16708146	OTTHUMG00000018883	0.215835	0.00427494	7.27981	6.25608	1.02373
		16972702	MIR1305	0.263924	0.014242	4.53661	3.51507	1.02155
		16724235	GYLTL1B	0.291991	0.0384942	9.35169	8.33251	1.01918
		16670079	PDIA3P	0.37148	0.0406837	8.25845	7.24542	1.01303
		17009676	LRRC1	0.215441	0.00318545	9.47725	8.46527	1.01197
		16679769	OR2L1P	0.310583	0.0222227	10.0892	9.07852	1.01069
		16836214	TOM1L1	0.292805	0.0278092	9.59206	8.5844	1.00766
		17083595	TYRP1	0.318654	0.0263113	6.32873	5.32596	1.00277
		16985688	MARVELD2	0.373561	0.0412081	7.66225	6.66118	1.00108
		16921461	LOC100996920	0.23056	0.00590024	10.1161	9.11629	0.999784
		16969300	NFKB1	0.258911	0.0096372	10.6701	9.67373	0.996355
		16829894	PLD2	0.270635	0.0223342	8.67454	7.67853	0.996006
		16778611	CCDC122	0.331543	0.0470546	7.60838	6.61885	0.989528
		17094389	CNTNAP3	0.192801	0.000537171	9.2522	8.26555	0.986656
		16837126	RNA5SP444	0.186308	0.0126266	5.79611	4.81443	0.98168
		16852812	SERPINB5	0.319535	0.0233417	7.74674	6.76849	0.978249
		16675290	RGS21	0.327824	0.0285965	5.78813	4.81085	0.977278
		17046781	AUTS2	0.222313	0.00409929	8.69261	7.71535	0.977264
		16861630	SPINT2	0.223094	0.00605294	9.98844	9.0112	0.977241
		16805345	MCTP2	0.261113	0.0225412	8.98841	8.01135	0.977058
		16884187	SH3RF3	0.264242	0.0108029	9.05025	8.07628	0.973966
		16891555	SGPP2	0.34701	0.0455456	8.63974	7.66731	0.972433
		16989018	SLC22A5	0.194526	0.00194769	8.67682	7.70501	0.971812
		16886066	THSD7B	0.243195	0.00931035	6.97511	6.005	0.970107
		16964799	SORCS2	0.319735	0.0256921	8.73006	7.76104	0.96902
		16866115	ZSCAN4	0.239312	0.0103761	6.33086	5.36603	0.964835
		17095544	LOC100653206	0.284487	0.0180516	7.48989	6.52821	0.961686
		16882895	KCNIP3	0.352092	0.0431859	8.41359	7.45248	0.961107
		17077004	SNAI2	0.358649	0.0361899	11.3762	10.4167	0.959404
		17094237	LOC441426	0.1934	0.00809075	7.73192	6.77397	0.957954
		16964831	MIR4798	0.270915	0.0121639	4.97825	4.02205	0.956202
		16804031	SCARNA15	0.354531	0.0457774	4.27998	3.32445	0.95553
		17087374	FOXE1	0.327585	0.0460131	8.47623	7.52156	0.954667
		17071497	GRHL2	0.298611	0.0189091	8.1273	7.17652	0.95078
		16919508	TOMM34	0.217912	0.00354203	8.37554	7.42652	0.949029
		16914867	PARD6B	0.366577	0.0387577	8.18361	7.23721	0.946393
		16840766	LOC100128281	0.22248	0.00454574	9.08315	8.13852	0.944629
		17047138	GTF2IRD1	0.254727	0.017159	8.42438	7.48558	0.938792
		17107362	FGF13-AS1	0.244306	0.00700251	5.36999	4.43187	0.938119
		16854397	KCTD1	0.324071	0.0348427	9.30576	8.37015	0.935611
		16793644	TMEM30B	0.340182	0.0289197	8.86736	7.93261	0.934745
		16858007	C19orf82	0.230221	0.0104306	8.14141	7.21365	0.927755
		16665656	RAVER2	0.370095	0.0434414	10.2987	9.37158	0.92714
		17079338	C8orf37	0.2102	0.00463252	8.09873	7.17783	0.920901
		16837101	RGS9	0.365732	0.0453073	7.78447	6.86368	0.920794
		16705778	SGPL1	0.204209	0.00428325	9.64486	8.72639	0.918471
		16859740	PIK3R2	0.180015	0.00190614	8.46435	7.54662	0.917729
		16807080	DPH6	0.20608	0.00237817	8.49941	7.58481	0.914596
		16702047	NET1	0.347373	0.041715	9.9511	9.03696	0.914148
		16995717	SNORD72	0.33146	0.0266988	4.39654	3.48567	0.91087
		16724346	MDK	0.224075	0.00618393	10.1296	9.21915	0.910408
		16744949	SCN4B	0.282207	0.0162719	8.52158	7.61597	0.905612
		16986632	CMYA5	0.256219	0.0307085	7.91494	7.00972	0.905222
		17072546	ZNF572	0.265818	0.0402158	6.78335	5.87824	0.905103
		17018652	MIR3925	0.389037	0.0498205	8.74522	7.84122	0.903996
		16766822	LRIG3	0.356733	0.0342246	9.7975	8.89487	0.902627
		16909777	IQCA1	0.263936	0.0111674	7.99543	7.09395	0.901485
		16712458	DNAJC1	0.274473	0.01336	9.78735	8.88837	0.898986
		16665182	PRKAA2	0.314536	0.0281309	8.2013	7.30528	0.896019
		17113973	OTTHUMG00000022365	0.328841	0.0351187	4.77336	3.87976	0.893605
		17091476	LCN12	0.211266	0.00896302	8.06094	7.16887	0.892069
		16669467	OTTHUMG00000013379	0.266044	0.0125907	6.10646	5.21509	0.891369
		16882507	RGPD2	0.284858	0.0190399	11.4039	10.5164	0.88748
		16730788	RAB39A	0.358799	0.0443031	6.74198	5.85588	0.886105
		17043843	TSPAN13	0.361957	0.0385571	9.17414	8.28885	0.885287
		17109020	GPR143	0.240206	0.0115048	7.70298	6.8181	0.884878
		16918953	NDRG3	0.203226	0.00333239	9.44973	8.56767	0.882058
		16870815	OTTHUMG00000182863	0.306927	0.023868	7.7666	6.88916	0.877445
		16826040	HERC2P4	0.342383	0.0395886	9.63013	8.75324	0.87689
		16949537	TP63	0.358164	0.0351598	10.1373	9.26467	0.872593
		16914478	EYA2	0.272907	0.0137174	9.61721	8.74491	0.872303
		16864829	ZNF610	0.328968	0.03312	7.6322	6.76117	0.871023
		16983611	LOC643401	0.332476	0.0352858	5.65294	4.79185	0.861082
		16874397	PTOV1-AS1	0.239145	0.00603558	7.89552	7.0365	0.859019
		16839277	NXN	0.318112	0.0498856	9.12707	8.26816	0.858906
		16873541	PNMAL1	0.252935	0.00917545	7.95654	7.09892	0.857615
		16785540	GPHN	0.277365	0.0230081	8.56582	7.70831	0.857514
		16767208	OTTHUMG00000169048	0.26253	0.0148903	7.35226	6.49513	0.857132
		16987381	RFESD	0.270441	0.0117915	7.05106	6.19411	0.856946
		17016379	HIST1H2BC	0.38126	0.0436233	7.21813	6.36153	0.8566
		16861577	ZNF540	0.263738	0.0112719	7.28741	6.43255	0.854859
		16720049	ATHL1	0.36529	0.0400922	9.50466	8.65051	0.854146
		17101368	SHROOM2	0.25294	0.0100242	7.28958	6.43641	0.853172
		16832147	ALDH3A2	0.375741	0.0467925	8.83447	7.99226	0.842207
		16685201	COL8A2	0.189266	0.0022593	7.95228	7.11105	0.841233
		16924551	APP	0.30344	0.0195182	11.5576	10.7174	0.840151
		16972912	SLC25A4	0.348515	0.0358581	7.65152	6.81292	0.838601
		16761464	PRR4	0.222038	0.0208845	8.21864	7.38183	0.836808
		16960442	PFN2	0.283134	0.0197109	8.36589	7.53156	0.834328
		16692341	ACP6	0.20618	0.0120151	8.1459	7.3126	0.833297
		16950259	OTTHUMG00000154935	0.328044	0.0333145	5.62074	4.78822	0.832516
		16670975	LOC100132111	0.19291	0.00790421	7.49348	6.66414	0.829339
		16790614	AJUBA	0.175247	0.00227354	7.66062	6.83142	0.829192
		16993202	FAM153C	0.265748	0.0117613	7.82255	6.99445	0.828104
		16822843	MEIOB	0.290566	0.0168725	4.81968	3.99177	0.827913
		16696924	STX6	0.224753	0.0046009	9.22418	8.39844	0.825739
		16748539	LOC100506314	0.290472	0.024015	7.73142	6.90573	0.825696
		17113725	LAMP2	0.340962	0.0385855	10.0098	9.18459	0.825247
		16912116	SYNDIG1	0.341109	0.0349503	7.00469	6.17993	0.824757
		16810743	IGDCC3	0.247719	0.00967191	8.01589	7.19236	0.82353
		16759525	LOC100130238	0.183371	0.00253068	7.25401	6.43516	0.81885
		16763246	GXYLT1	0.278006	0.0357283	8.86779	8.04976	0.818023
		16910020	HDAC4	0.220957	0.0101833	8.53556	7.71818	0.817388
		16700630	TARBP1	0.188946	0.000528018	9.22836	8.41204	0.816317
		16798254	PAR1	0.289437	0.0171484	8.08006	7.26558	0.814475
		16789607	OTTHUMG00000170462	0.248469	0.0313577	7.38715	6.57347	0.813676
		17081829	SLC45A4	0.384785	0.0472256	8.77518	7.96218	0.813
		16911463	BTBD3	0.34442	0.0310762	8.57353	7.76568	0.807853
		16760200	OTTHUMG00000168228	0.386761	0.0461671	4.64779	3.84337	0.804428
		16992265	RANBP17	0.308914	0.0361904	6.75952	5.95683	0.80269
		16963903	FLJ35816	0.327396	0.0455988	7.30814	6.50653	0.801601
		17114583	LINC00889	0.394114	0.0495105	5.54242	4.74417	0.798252
		16879232	CYP1B1-AS1	0.380688	0.0431424	7.72661	6.93219	0.79442
		16826175	VPS35	0.208956	0.00444324	10.5229	9.73159	0.791272
		16890027	OTTHUMG00000154733	0.327584	0.03074	6.89902	6.1094	0.789618
		16703340	MYO3A	0.247629	0.00811144	6.07706	5.28788	0.78918
		16903991	CCDC148	0.371027	0.0404142	6.16217	5.37395	0.788214
		16869350	DNASE2	0.193174	0.00235345	8.84097	8.05371	0.787264
		16669067	VANGL1	0.38791	0.0497642	8.02488	7.23939	0.785493
		16734467	KCNQ1OT1	0.253247	0.0103918	7.59469	6.81401	0.780683
		16921464	LOC644450	0.252767	0.00995649	9.87899	9.09946	0.779526
		16730296	KDM4D	0.175526	0.00257342	6.62636	5.84721	0.779153
		16971443	FAM160A1	0.24816	0.00855325	8.38055	7.60388	0.776668
		16866650	GAMT	0.223638	0.00418585	9.63833	8.86255	0.775778
		17025046	CNKSR3	0.283107	0.0143773	8.01099	7.23589	0.775101
		16717359	GOT1	0.379112	0.0448069	9.69603	8.92143	0.774595
		16860221	ZNF257	0.324309	0.0279433	6.84966	6.07693	0.77273
		16874097	HSD17B14	0.258829	0.00923636	7.21796	6.44562	0.772346
		17075112	PSD3	0.239873	0.0107485	7.80154	7.03024	0.771295
		16851768	DSG2	0.277577	0.0141725	9.27378	8.50348	0.770301
		17052413	TAS2R3	0.209998	0.0030818	7.78225	7.01261	0.769645
		17107118	ZNF449	0.231644	0.00678286	7.36548	6.59809	0.767388
		16989897	CXXC5	0.212412	0.00297782	10.1314	9.36579	0.765566
		16677913	DEGS1	0.236784	0.00580095	9.50044	8.73543	0.765006
		16802771	BBS4	0.175563	0.00100559	8.46572	7.70204	0.763679
		16678561	URB2	0.238103	0.00873424	7.53773	6.7752	0.762531
		16999379	ALDH7A1	0.254131	0.0375894	8.10881	7.34671	0.762095
		17056621	DPY19L2P1	0.375475	0.0414874	5.30847	4.54641	0.762062
		16984336	C5orf51	0.23937	0.0223332	8.83278	8.07077	0.76201
		16927040	MRPL40	0.290434	0.0175623	6.95614	6.19637	0.759766
		16682425	RCC2	0.203317	0.01102	11.1161	10.3565	0.759653
		16711164	OTTHUMG00000017541	0.268447	0.0132308	7.53382	6.77498	0.758841
		16826367	N4BP1	0.192858	0.00174349	8.85842	8.10155	0.756861
		16876147	ZNF132	0.164863	0.000235559	7.35199	6.60009	0.751903
		17021831	GPR63	0.291895	0.0175429	6.31434	5.56266	0.751678
		16883380	C2orf15	0.268415	0.0138119	6.12717	5.37577	0.751394
		16827574	ESRP2	0.312642	0.0212704	8.12054	7.37201	0.748529
		16861457	ZNF790-AS1	0.243431	0.0100516	7.67103	6.92309	0.747942
		16711143	ADARB2	0.323401	0.0278821	7.61815	6.87332	0.744829
		16667258	FNBP1L	0.342704	0.039139	8.85772	8.11401	0.743712
		16912244	FAM182A	0.337481	0.0320532	4.60119	3.85923	0.741961
		16683445	FUCA1	0.222145	0.00537035	9.20882	8.46811	0.740709
		16742371	LOC100996578	0.179357	0.00117675	5.88466	5.1445	0.740164
		16857282	KDM4B	0.231509	0.00857873	9.04381	8.30398	0.739823
		16978654	OTTHUMG00000160994	0.355567	0.0346432	4.10684	3.36749	0.739351
		17095712	ROR2	0.326725	0.0248912	7.76559	7.02733	0.738254
		17051392	SMO	0.263516	0.0133874	8.31427	7.57642	0.737851
		16781219	GRTP1	0.220478	0.00407151	7.77649	7.03977	0.736713
		16958704	TXNRD3	0.247559	0.00763099	7.97317	7.23742	0.735758
		16879205	RMDN2	0.238921	0.0309198	8.2316	7.49755	0.734047
		16824470	ARL6IP1	0.243863	0.0228826	12.08	11.3476	0.732442
		17054243	PDGFA	0.319445	0.0359566	8.2534	7.52164	0.731763
		16819539	GPR56	0.270468	0.0187763	9.52458	8.7948	0.729778
		16780481	SLC15A1	0.193422	0.00520458	6.74341	6.01562	0.727793
		16885509	CCDC74B-AS1	0.376872	0.044242	7.45702	6.73035	0.726665
		16812982	MRPL46	0.250438	0.0080071	8.28189	7.55649	0.725401
		16679480	MIR4677	0.28147	0.0383245	9.1152	8.38987	0.725336
		16795368	STON2	0.252313	0.00854124	7.92396	7.20072	0.723248
		16912238	LOC100134868	0.306525	0.0338131	7.89833	7.17555	0.72278
		16754536	SYT1	0.318559	0.0218694	7.56536	6.84304	0.722317
		16950058	MFI2-AS1	0.203259	0.00493964	8.05038	7.32842	0.721961
		16683387	LOC100506963	0.387235	0.0471263	8.49816	7.77676	0.721397
		17109704	MIR23C	0.221768	0.00960952	4.83651	4.11555	0.72096
		16894848	WDR35	0.265799	0.0194417	7.91703	7.20059	0.716442
		16929782	GGA1	0.183624	0.000645603	7.71802	7.00213	0.715893
		16886757	PKP4	0.283532	0.0156308	9.75404	9.03907	0.714971
		16677977	DNAH14	0.284386	0.0144762	6.30495	5.59091	0.714039
		17085290	CNTNAP3B	0.298689	0.0216739	8.06562	7.35267	0.712953
		16971497	DKFZP434I0714	0.248008	0.0344294	8.22699	7.51522	0.711778
		17101312	OTTHUMG00000021104	0.259281	0.0109573	7.02407	6.31263	0.71144
		16944096	ATP6V1A	0.174794	0.00133691	8.87323	8.16325	0.709982
		16708668	LOC100505761	0.220987	0.00369409	7.30033	6.5911	0.709225
		16860203	ZNF429	0.264205	0.0110302	8.0572	7.34806	0.709146
		17108067	SLC6A8	0.364034	0.0469531	8.4152	7.70771	0.707487
		16726183	COX8A	0.364171	0.0444473	10.8633	10.1559	0.707423
		16995715	RPL37	0.257303	0.00915676	8.003	7.29659	0.706416
		16944912	MIR544B	0.256789	0.00984637	5.81052	5.10527	0.705255
		17063448	LOC100129148	0.320286	0.0301767	6.6123	5.91059	0.701702
		16886448	LYPD6	0.330347	0.0336591	6.42654	5.72556	0.700972
		16788014	C14orf132	0.258935	0.0123724	6.99762	6.29793	0.699694
		16798166	SNORD116-28	0.178376	0.000892803	8.30408	7.60749	0.696582
		16686852	SKINTL	0.270962	0.0174361	5.85638	5.16037	0.696005
		17048380	MGC16142	0.327384	0.0372532	5.96948	5.27714	0.692336
		16668677	PIFO	0.220532	0.00843214	6.97096	6.27922	0.691733
		16948738	AP2M1	0.190625	0.000922508	8.84916	8.1585	0.690655
		16835781	XYLT2	0.228449	0.00516706	8.5195	7.82888	0.690629
		16873534	CCDC8	0.230052	0.00663213	8.14127	7.45072	0.690548
		17085336	OTTHUMG00000013230	0.312722	0.0236959	6.47169	5.7822	0.689487
		16810686	CLPX	0.250825	0.0190608	8.96223	8.27274	0.689486
		16862904	ZNF223	0.207429	0.00949366	7.20758	6.52207	0.685513
		17093373	SNORD121A	0.386432	0.0462518	4.91396	4.23006	0.683898
		16875952	VN1R1	0.179134	0.00122155	6.10495	5.42119	0.683757
		16671901	RAB25	0.298727	0.0178633	7.8506	7.16684	0.683754
		16700673	IRF2BP2	0.386001	0.0456376	10.3505	9.66801	0.68249
		16812685	HOMER2	0.209431	0.00291846	7.63174	6.95196	0.679786
		16698980	SLC30A1	0.304503	0.0271449	8.74248	8.06307	0.679403
		17084020	DMRTA1	0.386657	0.048041	7.53207	6.85433	0.677733
		17019610	SUPT3H	0.361421	0.0394816	8.43655	7.75971	0.676841
		16938092	SH3BP5-AS1	0.284509	0.0229071	9.62136	8.94462	0.676737
		16986539	SCAMP1	0.228984	0.0055692	9.31842	8.64208	0.676345
		16924521	LINC00515	0.224251	0.00452162	7.06531	6.38963	0.675677
		16853355	PARD6G-AS1	0.189386	0.00162264	7.62647	6.95311	0.673365
		16805495	IGF1R	0.210215	0.0043024	9.40295	8.73056	0.672385
		16813699	TTC23	0.250643	0.0172146	8.22397	7.55344	0.670534
		16871854	OTTHUMG00000182110	0.330335	0.0275587	6.75853	6.089	0.669527
		17111119	XAGE3	0.174799	0.00285928	6.29965	5.63044	0.669212
		17094245	FAM95B1	0.259833	0.0095697	7.97466	7.30653	0.668132
		16803894	FAM154B	0.37278	0.0486842	6.15657	5.489	0.66757
		17105766	MORF4L2-AS1	0.199909	0.00215114	7.63295	6.96543	0.667522
		17101896	CDKL5	0.280919	0.0181089	8.07076	7.40359	0.667175
		17049965	PSMC2	0.328559	0.0285376	10.0473	9.38028	0.666986
		16957715	IGSF11	0.301441	0.0190123	6.7124	6.04646	0.665932
		16798220	SNRPN	0.26411	0.0120221	10.3254	9.66197	0.663422
		16794705	NPC2	0.37273	0.0402359	11.4376	10.7743	0.663319
		16846985	FLJ44342	0.21289	0.00502096	8.61725	7.95421	0.663034
		16795082	POMT2	0.19282	0.0170278	8.22137	7.56189	0.659484
		17004066	TRIM7	0.388496	0.0479867	6.64805	5.98906	0.658986
		17087992	FAM206A	0.224492	0.00543062	8.29528	7.63864	0.65664
		16835909	EPN3	0.244119	0.0459254	7.87131	7.21549	0.655822
		17054923	PMS2	0.258152	0.0145802	8.51857	7.8629	0.65567
		17094755	SMC5-AS1	0.270539	0.0157535	7.99067	7.33674	0.653931
		16799690	SPINT1	0.356351	0.0464816	8.64117	7.98807	0.653103
		16936078	LOC642648	0.337651	0.0289001	6.33714	5.68489	0.652251
		16774427	LACC1	0.314793	0.0218089	7.9144	7.26283	0.651572
		16716420	PANK1	0.373528	0.040847	6.89367	6.2424	0.651266
		17046228	GBAS	0.252874	0.00997475	9.04664	8.39772	0.648925
		16761507	TAS2R50	0.265516	0.0196385	6.40015	5.75248	0.647661
		17094166	ZNF658	0.294179	0.0222741	8.56187	7.91422	0.647654
		17051157	RNU7-27P	0.209232	0.00395735	8.02865	7.38167	0.646983
		16686865	SPATA6	0.340515	0.0293087	8.99613	8.34918	0.646944
		17015166	SLC22A23	0.264729	0.0118449	8.86569	8.21884	0.646844
		16677324	FLVCR1	0.258503	0.0142511	8.46982	7.82356	0.646262
		16889393	NIF3L1	0.310457	0.0231432	5.84805	5.20202	0.646029
		16862866	ZNF221	0.192593	0.00323695	5.73944	5.09342	0.646023
		16805719	LRRK1	0.323365	0.0292695	8.34788	7.70261	0.64527
		16844292	SNORD124	0.206769	0.00338426	7.25186	6.60771	0.644158
		16667660	MIR553	0.309211	0.0232126	6.33813	5.69666	0.641473
		17064000	OR2A42	0.248695	0.00764692	6.65846	6.01793	0.640531
		17096436	TRIM14	0.303187	0.0265524	9.23611	8.59633	0.639774
		17099146	LOC100272217	0.251534	0.0106475	6.72827	6.09037	0.637898
		16711205	PITRM1	0.301268	0.0190064	9.54575	8.90786	0.637894
		16874225	NTF4	0.294086	0.016769	7.30442	6.6666	0.63782
		16668817	MOV10	0.19647	0.0107595	9.64179	9.00503	0.63676
		16978969	PLA2G12A	0.253025	0.00990492	8.65409	8.0174	0.636691
		17047397	RHBDD2	0.259146	0.0156748	9.2071	8.57067	0.63643
		16825057	GGA2	0.369729	0.0499876	10.0525	9.42134	0.631122
		16935767	MCAT	0.224829	0.0326018	6.9198	6.29031	0.629489
		16872496	C19orf54	0.310162	0.0204106	7.8424	7.21358	0.628819
		16837091	OTTHUMG00000179318	0.272792	0.0158589	7.68936	7.06123	0.628129
		16784967	SLC38A6	0.258942	0.0391766	8.51536	7.8874	0.627952
		16761502	TAS2R14	0.292167	0.0182865	8.86863	8.2417	0.626932
		17099769	CAMSAP1	0.287163	0.0152155	9.10986	8.48342	0.626438
		16897946	BCL11A	0.337603	0.030229	9.88925	9.26726	0.621991
		17055247	NDUFA4	0.230427	0.00782056	9.10464	8.48275	0.621889
		16697580	ZBTB41	0.242848	0.0107141	8.4478	7.82677	0.621031
		16814847	FAHD1	0.371401	0.0420905	8.06675	7.44802	0.618729
		16664072	LOC400752	0.184759	0.00139274	7.38743	6.76927	0.618157
		16961773	ZMAT3	0.333669	0.0470464	9.18806	8.57153	0.616529
		17078626	SLC10A5	0.353725	0.0354	6.79208	6.17736	0.614723
		16735946	OTTHUMG00000165905	0.364754	0.0413369	6.89851	6.28469	0.613825
		17109326	TMEM27	0.358518	0.0437948	5.46455	4.85194	0.612612
		17083996	CDKN2B-AS1	0.394348	0.0494727	6.26349	5.65177	0.611719
		16738933	VWCE	0.298832	0.0253312	8.00916	7.39759	0.611569
		16679650	SCCPDH	0.372616	0.0435668	9.06378	8.45287	0.610916
		17001040	GNPDA1	0.266397	0.0148183	7.25812	6.64758	0.610541
		16839131	TBCD	0.19649	0.0020085	10.1436	9.53584	0.607779
		16808314	PPIP5K1	0.38219	0.0438175	8.42764	7.82057	0.607074
		16909638	USP40	0.34737	0.0328712	8.57328	7.96649	0.606792
		16913403	MANBAL	0.271104	0.0465842	9.31378	8.70813	0.605652
		17058207	LINC00174	0.226055	0.00544551	7.47658	6.87104	0.605546
		16961919	DNAJC19	0.248453	0.0326119	8.27406	7.66886	0.605198
		17041090	CYP21A2	0.284446	0.014583	7.97932	7.37502	0.604304
		17073220	LY6K	0.283294	0.0278321	6.72622	6.12232	0.603904
		16792151	FLJ42220	0.240401	0.00747044	6.98694	6.38307	0.603868
		16963428	MFI2	0.252655	0.0107564	7.96532	7.36259	0.602728
		16877225	LPIN1	0.328116	0.0268637	8.32469	7.72405	0.600638
		16702696	MEIG1	0.272361	0.0297938	5.62968	5.03018	0.599494
		16837326	PRKAR1A	0.348768	0.0499148	11.135	10.5357	0.599244
		16667175	SNORA66	0.337771	0.0287652	7.36483	6.76815	0.596682
		17112993	TCEAL3-AS1	0.34236	0.0303465	4.65606	4.06004	0.596021
		16866232	ZNF544	0.169344	0.000236018	7.94147	7.34565	0.595818
		17110372	FLJ25917	0.339615	0.0288566	7.53878	6.94453	0.594253
		17105837	FAM199X	0.318762	0.0219655	8.30204	7.7087	0.593347
		17005197	RNF144B	0.358569	0.0406495	8.40936	7.81664	0.592718
		16845817	DCAKD	0.322026	0.0279501	9.83981	9.24743	0.592379
		16703713	RNA5SP309	0.381942	0.0439405	4.44096	3.84865	0.592318
		17090646	GTF3C4	0.196672	0.0134935	8.95205	8.36085	0.5912
		16874558	FAM71E1	0.230191	0.0092857	6.60743	6.01894	0.588495
		16710120	MIR3941	0.264078	0.0125859	4.48222	3.89398	0.588245
		17115913	CD99P1	0.385839	0.0452084	6.15609	5.56995	0.586141
		16669573	NBPF9	0.308854	0.0227144	11.5859	11.002	0.583889
		16994244	FASTKD3	0.374277	0.0485955	7.80872	7.22592	0.582803
		16954003	C3orf62	0.280879	0.0169065	7.54495	6.96267	0.58228
		16877270	MIR548S	0.318476	0.0244993	4.35249	3.77032	0.582162
		16819678	GINS3	0.291337	0.0163001	8.03133	7.45211	0.579227
		16799170	C15orf41	0.298895	0.018684	9.70002	9.12096	0.579062
		16860208	DHTKD1	0.263715	0.0237417	5.86993	5.29108	0.57885
		16767170	GRIP1	0.285362	0.0146149	6.62217	6.04346	0.578709
		16972119	FAM218A	0.270166	0.0187338	7.67222	7.09453	0.577685
		17020464	RAB23	0.215967	0.00340216	7.4249	6.84865	0.576254
		16687602	TTC22	0.261209	0.00986075	7.55423	6.97915	0.575077
		16895193	PFN4	0.192698	0.00308264	6.83511	6.26018	0.57493
		16753465	XPOT	0.294458	0.0177287	9.43286	8.85869	0.574171
		16919864	ZNF334	0.329897	0.0275928	8.47571	7.90166	0.57405
		16980031	MAML3	0.321266	0.0316805	9.26088	8.68701	0.573874
		16978995	ELOVL6	0.300962	0.0265342	7.42683	6.85327	0.573553
		16897667	CLHC1	0.229936	0.00934073	7.31953	6.74602	0.573507
		16747852	NANOG	0.283135	0.0426438	5.16468	4.59258	0.572097
		16954343	LUST	0.270023	0.0139394	5.94258	5.37111	0.571471
		16873557	PNMAL2	0.192661	0.00351959	7.08062	6.50979	0.570828
		16975928	USP46	0.318679	0.0312968	7.79171	7.22256	0.569143
		16945582	ATP2C1	0.34382	0.0308131	9.25082	8.682	0.568817
		16989054	RAD50	0.205946	0.0029303	9.86912	9.301	0.568123
		16734163	CHID1	0.229225	0.00595765	8.70666	8.1395	0.567154
		17075870	EXTL3-AS1	0.263942	0.0135637	7.36994	6.80303	0.566908
		16672457	DUSP23	0.312906	0.0209005	9.18096	8.61444	0.566518
		16925798	C21orf88	0.342925	0.0391396	6.84765	6.28378	0.563874
		17060281	FAM200A	0.222709	0.0256831	7.01158	6.44788	0.563704
		16827645	COG8	0.239675	0.00634976	9.10705	8.54434	0.562719
		16888512	ITGAV	0.290566	0.0162713	10.0207	9.45977	0.560913
		17053978	RNF32	0.224549	0.00544231	6.96741	6.40688	0.560528
		16661533	ATPIF1	0.269732	0.0185464	7.65674	7.09643	0.560303
		17001197	LARS	0.178041	0.00164687	9.81261	9.25246	0.560146
		16843269	OTTHUMG00000179638	0.321067	0.0310695	6.07309	5.51401	0.559087
		16709537	TRUB1	0.342685	0.0464181	7.21958	6.66102	0.558567
		16978296	LOC285556	0.299289	0.0236063	7.11754	6.55981	0.557724
		16902476	MAP3K2	0.255377	0.0321488	8.74634	8.18863	0.557706
		17055480	ANKMY2	0.349209	0.0444082	8.30275	7.7464	0.556352
		16948304	NDUFB5	0.318642	0.0303099	7.98548	7.42999	0.555496
		16791393	CBLN3	0.21135	0.00388425	8.51132	7.95625	0.55507
		17073259	LY6E	0.358458	0.0355671	7.95359	7.39892	0.554668
		16996201	DHX29	0.299165	0.0284266	9.08991	8.53673	0.553183
		17080862	LOC100507018	0.19258	0.000893154	7.46153	6.90921	0.552317
		16744524	USP28	0.244785	0.00720683	8.23255	7.68177	0.550779
		16870506	HOMER3	0.292665	0.017326	7.55306	7.00675	0.546306
		16809138	TRPM7	0.23125	0.00991277	10.1309	9.58753	0.543407
		16999817	KIF3A	0.312797	0.0497286	8.09602	7.55274	0.543288
		17055937	OSBPL3	0.296093	0.0172372	9.22359	8.68068	0.542904
		16913689	DHX35	0.298293	0.0183274	8.28571	7.74286	0.542857
		16799244	FAM98B	0.358784	0.041642	7.61087	7.06886	0.542006
		16680891	LRRC47	0.228922	0.00529868	8.91508	8.37424	0.540834
		16855026	PIAS2	0.172034	0.000729327	9.83613	9.29553	0.540601
		16718840	CACUL1	0.197142	0.0135868	9.2533	8.71273	0.540569
		16812738	HDGFRP3	0.203795	0.00243802	9.99466	9.45448	0.54018
		17079918	AZIN1	0.172186	0.000848082	9.44117	8.90242	0.53875
		16849913	ARL16	0.248297	0.0128284	8.41811	7.88668	0.531426
		16974244	MIR548I2	0.226621	0.0136341	7.73246	7.20108	0.531377
		16995333	LOC646719	0.252126	0.00906462	8.21715	7.68663	0.530521
		17043355	AIMP2	0.318453	0.0286975	8.92875	8.39895	0.529793
		16975578	GNPDA2	0.270352	0.0168476	7.8022	7.27256	0.529644
		16878454	PLB1	0.239837	0.00814625	7.51518	6.98706	0.528119
		16831947	TVP23B	0.255552	0.0179281	6.08778	5.55972	0.528056
		16733883	ANO9	0.348768	0.0413568	9.01659	8.48954	0.52704
		16935905	KIAA1644	0.357266	0.0481666	7.1176	6.59191	0.525691
		17056358	GGCT	0.228333	0.00977399	7.24309	6.71788	0.525207
		16895387	DTNB	0.248344	0.00774195	8.50158	7.97724	0.524339
		16762597	TM7SF3	0.258769	0.0124333	10.3408	9.81668	0.52415
		17113635	UPF3B	0.350909	0.045326	8.07134	7.54859	0.522748
		16678680	ARV1	0.261242	0.0233245	8.42434	7.90168	0.522666
		16719393	DHX32	0.321998	0.0367686	8.54733	8.02522	0.522102
		17062460	WASL	0.223716	0.0068655	9.59837	9.07656	0.521811
		17077866	TCF24	0.275191	0.0130288	6.64437	6.12363	0.520743
		16936230	BRD1	0.263791	0.0463826	8.34325	7.82411	0.519141
		17105665	LINC00630	0.310101	0.0208598	8.76448	8.24561	0.51887
		17048437	GNGT1	0.341163	0.0398431	4.14063	3.62189	0.518733
		16681477	CLSTN1	0.221061	0.00475692	9.87612	9.35741	0.518719
		16989421	PCBD2	0.272944	0.0125475	7.77781	7.25914	0.518671
		16917173	MKKS	0.319711	0.0237546	7.63912	7.12128	0.517834
		17009289	RUNX2	0.324356	0.0294042	7.81663	7.29931	0.517323
		16744408	TIMM8B	0.289417	0.0227032	7.56193	7.04533	0.516605
		16916196	TCEA2	0.336187	0.038074	8.27119	7.75565	0.515536
		16812997	DET1	0.244484	0.00964343	8.91527	8.39974	0.515533
		16798085	IPW	0.3631	0.0378001	8.53611	8.02192	0.514186
		17111599	LOC92249	0.213081	0.00478929	9.24518	8.73291	0.512279
		17023414	PTPRK	0.248164	0.00781462	8.42302	7.91076	0.512263
		16768941	IKBIP	0.225928	0.014814	7.91774	7.40621	0.511534
		16871873	LOC100631378	0.375112	0.047854	4.78928	4.27883	0.510457
		16774162	NHLRC3	0.222381	0.00696646	8.5784	8.0696	0.508809
		16900450	STARD7	0.289586	0.0285615	10.3861	9.87796	0.508148
		16892075	ARMC9	0.222586	0.00585784	7.27741	6.76962	0.507795
		16699795	NVL	0.236149	0.00582487	8.19098	7.68383	0.507152
		17021596	RRAGD	0.338159	0.0391967	8.91575	8.40938	0.506368
		16814779	HN1L	0.321152	0.0293595	8.56338	8.05766	0.50572
		16859319	C19orf44	0.21875	0.00332196	7.04848	6.54374	0.504738
		16816739	UQCRC2	0.323043	0.024874	11.1715	10.6669	0.504591
		16833082	RHOT1	0.38308	0.0478223	10.3361	9.83251	0.50355
		16713335	ZNF248	0.261226	0.0125297	8.51968	8.01664	0.503047
		16898210	TMEM17	0.295003	0.0244009	6.34536	5.84333	0.502029
		17112439	RPS6KA6	0.252756	0.0124724	7.68846	7.18788	0.500576
		16938061	CAPN7	0.263833	0.0288953	10.292	9.79181	0.500176
		17088213	C9orf43	0.35252	0.0416765	5.8912	5.39116	0.50004
		16960642	ARHGEF26-AS1	0.340095	0.0299303	6.29421	5.79515	0.499063
		16711114	LOC100288619	0.263942	0.0403947	5.56743	5.06943	0.498003
		16793632	TRMT5	0.230358	0.0274139	7.60087	7.10299	0.497881
		16716443	FLJ37201	0.344324	0.0314875	6.714	6.21625	0.497753
		16722659	SPTY2D1-AS1	0.178035	0.00250282	6.22528	5.72761	0.497666
		16663242	CCDC30	0.193463	0.00246002	7.03312	6.53559	0.497538
		16838509	GAA	0.253411	0.00867973	8.5265	8.02944	0.497063
		16903028	ZRANB3	0.222193	0.0111423	7.47323	6.97619	0.497044
		16894127	CMPK2	0.36279	0.039653	7.2476	6.75248	0.495125
		16994960	GOLPH3	0.189099	0.00161659	11.0216	10.5265	0.49509
		16900802	TMEM131	0.23956	0.00814863	10.4658	9.9713	0.494455
		17054950	EIF2AK1	0.268607	0.0192647	9.65781	9.16537	0.492442
		16899062	DUSP11	0.215857	0.00727852	9.28428	8.79201	0.492269
		16803269	FBXO22	0.374617	0.0478803	9.62188	9.13084	0.491035
		16828696	SDR42E1	0.357	0.03802	7.67105	7.18024	0.490805
		16932914	ZNF280B	0.179585	0.00155702	8.31635	7.82558	0.49077
		17049729	CUX1	0.218054	0.00346723	9.22684	8.73682	0.490026
		16780137	OTTHUMG00000017165	0.263137	0.012355	4.05998	3.57003	0.489944
		16962264	MAGEF1	0.252771	0.00863073	7.96022	7.47067	0.489544
		17111594	SPIN4	0.26366	0.0127025	8.67522	8.18624	0.488977
		16985440	MAST4	0.269915	0.0135006	9.59233	9.10357	0.488761
		16830094	LOC100130950	0.218707	0.00697381	7.51262	7.02392	0.488703
		17073908	MFSD3	0.318156	0.0357014	8.01096	7.52231	0.488651
		16859856	CRTC1	0.263785	0.0453692	8.94158	8.45424	0.487339
		16694855	MIR765	0.319321	0.043146	6.10487	5.61828	0.48659
		16799492	LOC100505573	0.339924	0.0318292	8.25148	7.76621	0.485265
		16814336	RAB40C	0.248305	0.014805	8.17312	7.68791	0.485217
		16897797	PNPT1	0.376555	0.0435973	8.41265	7.92922	0.483427
		16768088	OTTHUMG00000170253	0.371548	0.0431565	5.24155	4.75918	0.482376
		16711797	NUDT5	0.334645	0.0417402	9.44801	8.96869	0.479325
		16818461	LOC100289574	0.287251	0.0148162	8.83604	8.35871	0.477339
		16714286	FLJ31813	0.224026	0.00507436	6.52433	6.04736	0.476971
		16949564	LEPREL1-AS1	0.249052	0.00896796	6.95768	6.48081	0.476868
		16905464	OTTHUMG00000155365	0.223238	0.00455935	5.54535	5.06984	0.475502
		17088838	RABGAP1	0.223305	0.00570711	9.79709	9.32173	0.475353
		16679270	OTTHUMG00000041437	0.318379	0.0233496	4.22217	3.74819	0.473984
		16865730	CCDC106	0.289523	0.0201126	6.5815	6.10817	0.473339
		16723326	QSER1	0.356778	0.0404719	9.53795	9.0648	0.473146
		16999888	GDF9	0.323561	0.0319797	6.02483	5.55394	0.470883
		17117429	LOC440742	0.230536	0.00506452	5.66619	5.19601	0.470178
		16791667	MIR624	0.349338	0.0330142	4.09997	3.6304	0.469572
		16862333	SNRPA	0.385961	0.0466999	10.8597	10.3903	0.46941
		16836564	CLTC	0.217982	0.00324684	10.7397	10.2712	0.468507
		16827366	ATP6V0D1	0.387863	0.0478052	9.87214	9.40368	0.468458
		17048167	CLDN12	0.18273	0.00127669	6.64499	6.17661	0.468381
		16790556	PRMT5	0.3272	0.0496439	8.50303	8.03505	0.467974
		16806178	MIR4715	0.163975	0.000276703	6.11592	5.6487	0.467225
		17102668	ATP6AP2	0.312715	0.0300123	9.77619	9.30904	0.467151
		17049939	PMPCB	0.228523	0.0363948	10.2637	9.79656	0.467126
		16982607	LOC100288152	0.308877	0.0222168	7.85457	7.38777	0.466797
		16809187	SPPL2A	0.228819	0.00526604	10.1585	9.69475	0.463734
		16692209	NBPF11	0.327064	0.0261959	10.9075	10.445	0.462503
		16736473	HPS5	0.207781	0.00253915	8.79268	8.33071	0.461975
		16988267	LOC728342	0.292739	0.0163741	6.40259	5.94095	0.461637
		16881246	NAGK	0.323101	0.0277623	9.30288	8.84153	0.461344
		16751319	SCN8A	0.383882	0.044985	6.51796	6.05704	0.460919
		16893709	SH3YL1	0.209698	0.0028187	8.27946	7.81904	0.460425
		17100597	C9orf37	0.274072	0.0125953	7.53966	7.07968	0.459982
		16866002	ZNF543	0.179647	0.00228494	8.74055	8.28067	0.45988
		16868410	ZNF121	0.279453	0.0243311	10.0365	9.57692	0.459612
		16781367	OTTHUMG00000170339	0.329654	0.0292175	5.25491	4.79545	0.459455
		17101029	PLCXD1	0.259376	0.0289158	7.63699	7.17769	0.459296
		16694237	YY1AP1	0.304425	0.0199512	8.18528	7.72658	0.458697
		16710740	LRRC27	0.178462	0.00260452	7.29904	6.84085	0.458191
		16998621	NUDT12	0.379137	0.0426134	6.25564	5.80122	0.454412
		17015064	MYLK4	0.323201	0.0249954	6.49416	6.03977	0.454381
		17117829	LOC100293044	0.298736	0.0238759	8.35747	7.90426	0.453212
		17076829	RNF170	0.331606	0.0267492	8.14288	7.69001	0.452875
		17059029	RSBN1L-AS1	0.247676	0.00930556	6.22225	5.76949	0.452759
		17079808	RRM2B	0.264025	0.0112878	7.34258	6.89071	0.451872
		16870780	MIR1270-1	0.338716	0.0289793	7.82989	7.37847	0.451415
		16905076	SLC25A12	0.358099	0.0391517	8.47291	8.02166	0.451248
		17061430	LOC100216546	0.343688	0.0379199	7.73078	7.27986	0.450922
		16814083	SNRNP25	0.252923	0.015188	7.44031	6.98951	0.450799
		16859874	UPF1	0.181066	0.00261362	9.84791	9.39794	0.449966
		17087836	FKTN	0.32102	0.0477879	7.99182	7.54205	0.449774
		16839853	CAMKK1	0.350387	0.0352293	6.67303	6.22386	0.449166
		16898890	MCEE	0.265724	0.0130529	7.66132	7.2123	0.449019
		17086596	SPIN1	0.223611	0.00427054	10.2187	9.77186	0.446884
		16905056	METTL8	0.327315	0.0292137	7.90075	7.45433	0.446411
		16996645	DIMT1	0.356578	0.0348383	8.35207	7.90707	0.445006
		16837493	TTYH2	0.250953	0.0115226	8.05371	7.60906	0.444648
		16807459	RMDN3	0.252086	0.021177	8.59583	8.15275	0.443085
		16896315	RNA5SP91	0.358658	0.0360338	3.99603	3.55313	0.442906
		16915530	MIR548AG2	0.247726	0.0185779	3.8005	3.35859	0.441908
		16685042	ZMYM6	0.244979	0.0131985	9.93495	9.49475	0.440199
		17103717	CLCN5	0.248046	0.0136837	7.30701	6.86703	0.439976
		16801835	LACTB	0.28595	0.0147784	8.46124	8.02201	0.439235
		16744393	PIH1D2	0.306831	0.0217569	5.05841	4.6192	0.439205
		16999974	C5orf15	0.18307	0.00135675	9.32298	8.88411	0.43887
		16756627	UNG	0.255478	0.027127	8.30668	7.86953	0.43715
		17047461	MDH2	0.345209	0.0312597	8.8146	8.37813	0.436468
		17098004	RAB14	0.195961	0.00287799	10.7441	10.3082	0.435874
		17063420	ZC3HAV1L	0.356745	0.0416903	8.32618	7.89208	0.434096
		16663665	KDM4A	0.366605	0.03808	8.9989	8.56494	0.433958
		16879276	MORN2	0.364718	0.0458656	7.41678	6.98447	0.432314
		16902875	WTH3DI	0.299253	0.0181814	3.62393	3.19176	0.432172
		17015033	GMDS	0.270986	0.0125384	8.55328	8.1213	0.431985
		17017400	SAPCD1-AS1	0.35964	0.0459232	7.44957	7.01828	0.431294
		16897056	LRPPRC	0.243408	0.00709777	9.629	9.19848	0.430514
		17109901	TAB3	0.336149	0.0365447	9.63006	9.20163	0.428424
		17071584	ATP6V1C1	0.176202	0.00228061	8.82772	8.39974	0.42798
		16950470	SRGAP3	0.323733	0.0310563	7.56395	7.13671	0.427245
		17002813	UBTD2	0.386842	0.0499989	8.50139	8.07436	0.427029
		16681735	FBXO2	0.372392	0.0427376	7.35718	6.93016	0.427017
		16780664	TMTC4	0.292661	0.0345821	8.30502	7.88026	0.42476
		16823561	NMRAL1	0.189768	0.00348248	8.46654	8.04242	0.42412
		17071820	EMC2	0.324303	0.0307034	6.96431	6.54157	0.422743
		16858774	CALR	0.172605	0.00048557	12.2822	11.8596	0.422604
		16740094	CDC42BPG	0.252597	0.00973945	7.52071	7.09819	0.422516
		16761385	KLRAP1	0.377169	0.0437792	7.4953	7.07298	0.422321
		17099799	UBAC1	0.327625	0.0277882	8.19599	7.77405	0.421943
		17020757	KHDC1	0.189486	0.000703571	7.05331	6.63207	0.421244
		16721023	OTTHUMG00000166985	0.353441	0.0334131	4.33839	3.91754	0.420852
		17063100	AKR1B1	0.390893	0.0480301	9.01397	8.59384	0.420137
		17052034	MTPN	0.341961	0.0303831	5.12529	4.70753	0.417759
		17072678	PVT1	0.274657	0.0129132	7.72508	7.3075	0.41758
		16926241	HSF2BP	0.375916	0.0421783	6.57009	6.15293	0.417162
		16872276	FCGBP	0.224391	0.00663923	7.36397	6.94718	0.416785
		16983927	DNAJC21	0.270589	0.0141685	8.95927	8.54629	0.412978
		16866100	ZNF211	0.175649	0.00141456	7.71677	7.30399	0.412777
		16664150	TMEM69	0.179346	0.00041414	9.36873	8.9567	0.412027
		16886937	RNA5SP108	0.265801	0.0368078	5.78986	5.37787	0.411982
		16904024	WDSUB1	0.320387	0.0499425	8.06888	7.65722	0.411664
		16692297	PRKAB2	0.373638	0.0469022	8.99537	8.5859	0.409469
		16815072	ABCA17P	0.327461	0.0288016	6.359	5.94962	0.409377
		16974146	ABLIM2	0.378327	0.0477586	7.17916	6.77	0.409157
		17052157	TTC26	0.192143	0.00653941	6.78544	6.37773	0.407713
		16822105	SPIRE2	0.371458	0.0407456	6.20561	5.79985	0.405766
		17105821	H2BFM	0.178524	0.00169808	5.04365	4.63839	0.405263
		16709799	FAM45A	0.247518	0.00732631	6.5071	6.10193	0.405172
		16729784	OTTHUMG00000167225	0.270021	0.0271476	5.54158	5.1379	0.403681
		16834370	MLX	0.300564	0.0298873	9.60037	9.19777	0.402603
		17097895	PSMD5	0.333754	0.0295127	8.66554	8.26393	0.401615
		16806122	UBE3A	0.34844	0.0421382	9.76582	9.36529	0.400526
		16772020	OTTHUMG00000168693	0.175912	0.00167632	7.14347	6.74334	0.400133
		17115229	IDH3G	0.342398	0.0376022	9.59837	9.19989	0.398479
		16998368	ERAP1	0.326762	0.02755	9.92448	9.52603	0.398452
		17068636	SGK196	0.252566	0.013693	8.80055	8.40231	0.398244
		16812053	TBC1D2B	0.270234	0.0132902	8.83181	8.43379	0.398024
		16983521	GUSBP1	0.304601	0.0321216	8.49468	8.09709	0.397593
		16835003	CRHR1-IT1	0.249922	0.020083	7.75176	7.35512	0.396646
		16868254	ZNF558	0.371222	0.0394084	7.60188	7.20533	0.396554
		16806561	LOC101059939	0.284509	0.0184846	6.55843	6.16206	0.396372
		17064828	OTTHUMG00000151447	0.298707	0.018105	4.85631	4.46072	0.395594
		17056536	RP9	0.167127	0.000349901	7.28782	6.89239	0.395432
		17099309	DDX31	0.355024	0.038952	8.16131	7.76589	0.395428
		16846416	PHB	0.37918	0.043788	7.75104	7.35747	0.393571
		16902279	TFCP2L1	0.348357	0.0325824	6.47388	6.08047	0.393404
		17042805	GET4	0.274379	0.0134498	7.65001	7.25837	0.391636
		16816996	UBFD1	0.384082	0.0466267	8.74876	8.35863	0.390121
		16705041	MTRNR2L5	0.232289	0.00751284	3.69175	3.30305	0.388704
		16820592	CYB5B	0.290643	0.0176616	9.77141	9.38271	0.388697
		17002240	CLINT1	0.265874	0.0118671	10.3377	9.94935	0.388346
		16799357	EIF2AK4	0.318723	0.0253296	8.96831	8.57997	0.38834
		16741161	FAM86C2P	0.326822	0.025396	7.99744	7.60919	0.388252
		16802702	SENP8	0.307171	0.0203419	6.6063	6.21978	0.386518
		16949882	SDHAP2	0.370105	0.0417028	8.98792	8.60173	0.386184
		17104132	RRAGB	0.352032	0.0329286	7.96853	7.58339	0.385143
		16872580	ATP5SL	0.301402	0.0222509	7.77658	7.39187	0.384712
		16856828	ZNF554	0.335261	0.0470493	6.59014	6.20725	0.382895
		16669288	WDR3	0.319126	0.023713	8.10295	7.72013	0.382829
		16757969	MLEC	0.269957	0.0357249	9.88286	9.50061	0.382252
		16839976	ANKFY1	0.328772	0.031161	9.39457	9.01236	0.382215
		16812011	OTTHUMG00000173008	0.263755	0.012734	4.59592	4.21428	0.38164
		16796727	BEGAIN	0.387855	0.0488332	6.44481	6.06461	0.380192
		17054214	OTTHUMG00000151405	0.387736	0.0466329	5.64619	5.26844	0.377753
		16994030	SDHAP3	0.247962	0.0191467	9.67933	9.30195	0.37738
		16930021	MIR4534	0.189454	0.00699869	6.99963	6.62344	0.376187
		16712323	NSUN6	0.245249	0.025626	8.39107	8.01603	0.375043
		16772811	ZNF605	0.323296	0.0250162	7.39791	7.02475	0.373156
		17047574	OTTHUMG00000155723	0.342521	0.0455685	9.25216	8.87949	0.372666
		16823153	PDPK1	0.229854	0.0246052	9.73477	9.36235	0.372423
		16822466	C16orf13	0.35691	0.034683	8.53484	8.16354	0.371304
		17046282	SNORA15	0.330097	0.0273145	3.26021	2.8892	0.371007
		16663792	ATP6V0B	0.328761	0.0261197	8.49934	8.12871	0.370628
		16776856	LAMP1	0.269823	0.0279807	9.99224	9.62182	0.370424
		16798426	SNORD115-41	0.349593	0.0435903	3.18038	2.81134	0.369037
		16719272	METTL10	0.260183	0.0233137	8.21644	7.84923	0.367208
		16848032	PSMD12	0.24806	0.00745667	9.28511	8.91872	0.36639
		16887601	DYNC1I2	0.259242	0.00960907	8.36517	7.99902	0.366144
		16928550	KIAA1967	0.264131	0.0122832	6.71478	6.34904	0.365732
		16853996	AFG3L2	0.352533	0.0370021	8.30816	7.94392	0.364239
		16871000	OTTHUMG00000175754	0.344929	0.0328652	6.99995	6.63669	0.363258
		17061592	COG5	0.289634	0.0181914	10.1239	9.76072	0.363212
		17043328	CCZ1	0.223815	0.0184376	7.52668	7.16404	0.362648
		17092153	AK3	0.384822	0.0497157	10.3801	10.0175	0.362595
		16900931	TSGA10	0.322074	0.0389515	7.02762	6.66505	0.362566
		16826086	SLC6A10P	0.29911	0.0198078	8.4653	8.10293	0.362375
		16790832	MYH6	0.358113	0.0400846	5.44562	5.08506	0.360556
		16907087	TYW5	0.271316	0.0187565	7.74031	7.38145	0.358855
		16686611	LRRC41	0.175311	0.012673	9.56611	9.20735	0.358761
		16841696	ZSWIM7	0.236865	0.00887932	7.26028	6.90196	0.358321
		17084448	DNAI1	0.358723	0.0428479	5.99773	5.63979	0.357939
		16890698	OTTHUMG00000155315	0.345906	0.0338694	3.9667	3.60886	0.357845
		16736529	UEVLD	0.246621	0.0294348	7.79768	7.44135	0.356328
		16869067	ZNF625-ZNF20	0.259145	0.0344889	6.75572	6.3997	0.356023
		16883530	OTTHUMG00000153029	0.377248	0.0425999	5.52168	5.16582	0.355864
		17068724	KIAA0146	0.221296	0.00590712	8.20885	7.85342	0.355432
		16890998	STK36	0.254129	0.00943097	8.2513	7.89596	0.355337
		17114895	TMEM185A	0.263385	0.0102239	7.69084	7.33628	0.354561
		17054302	COX19	0.342285	0.030033	6.83385	6.47953	0.354324
		16963922	MAEA	0.251182	0.00911683	8.34853	7.99422	0.354307
		16691434	RNA5SP55	0.289588	0.0472576	7.31415	6.95992	0.354225
		17065860	LOC101060654	0.237292	0.00624217	6.6953	6.34108	0.354214
		16720677	TOLLIP-AS1	0.221849	0.00438967	7.85725	7.50485	0.352398
		16998019	MBLAC2	0.318246	0.0238919	7.73796	7.38583	0.352129
		16995957	PAIP1	0.328914	0.0291598	8.90401	8.55191	0.352098
		16678824	MAP10	0.312302	0.0346401	5.78141	5.42943	0.351983
		17004125	TRIM52	0.339554	0.0346054	8.47511	8.12328	0.351824
		16768205	CEP290	0.270078	0.0173871	8.22167	7.87071	0.350965
		16787236	SPATA7	0.276168	0.0137129	7.1381	6.78805	0.350056
		16771940	CDK2AP1	0.224492	0.00446391	8.52592	8.17628	0.349644
		16855454	TXNL1	0.329364	0.0379905	9.47423	9.12616	0.348075
		16690928	MIR4256	0.263804	0.0108072	5.39187	5.04514	0.34673
		16685427	C1orf109	0.268168	0.0459999	6.97749	6.6313	0.346195
		16695258	PIGM	0.188719	0.00257825	9.09069	8.7452	0.345486
		16907353	ALS2	0.253092	0.0210436	7.71586	7.37039	0.345467
		16833345	AP2B1	0.21858	0.00594026	10.6194	10.2746	0.344761
		16989146	HSPA4	0.348259	0.0468295	8.89153	8.54702	0.344508
		16873268	ERCC2	0.222275	0.00474886	8.30581	7.96197	0.343843
		16925668	PSMG1	0.21613	0.00364563	4.77611	4.43297	0.343142
		16907458	WDR12	0.371319	0.0457219	6.68196	6.33893	0.343027
		16805832	HERC2P3	0.343714	0.0323741	10.4513	10.1084	0.342964
		16976133	AASDH	0.344362	0.0351217	8.49908	8.15636	0.342721
		17084097	IFT74	0.298484	0.0194005	7.87808	7.53655	0.341529
		16944894	UMPS	0.322953	0.0449528	7.99617	7.65497	0.341206
		16669840	PEX11B	0.258972	0.00927947	9.66671	9.32568	0.341028
		17058731	GTF2IP1	0.247831	0.0140954	11.6735	11.3325	0.341002
		16868689	TYK2	0.300675	0.0216608	8.59772	8.25692	0.340799
		16801941	SNX1	0.288073	0.0173287	8.98307	8.64435	0.338715
		17053850	LOC100132707	0.263467	0.0175727	8.72975	8.3921	0.337648
		16847398	APPBP2	0.318829	0.0486316	9.01978	8.68221	0.337564
		16666091	ZRANB2-AS2	0.229133	0.0052169	5.40888	5.07148	0.337403
		17000040	CDKL3	0.29461	0.0216674	5.56071	5.22333	0.337378
		16942648	GXYLT2	0.299055	0.0270477	10.1422	9.8056	0.336642
		17030467	VARS2	0.243816	0.00791533	8.08416	7.74773	0.336431
		16765389	ATP5G2	0.222258	0.00377649	7.37154	7.03668	0.334863
		16807071	ZNF770	0.319718	0.0244433	8.6713	8.3369	0.334405
		16681511	LZIC	0.240029	0.0169017	8.68226	8.34819	0.334065
		16989912	OTTHUMG00000163333	0.318491	0.0237039	6.70605	6.37325	0.332795
		17086921	FAM120A	0.323684	0.0245454	9.59925	9.2665	0.332747
		16899801	POLR1A	0.347347	0.0330647	8.15601	7.82442	0.331596
		16831621	RAI1	0.237786	0.0246089	8.42902	8.09759	0.331433
		16823570	CDIP1	0.350026	0.0331071	8.08827	7.75728	0.330983
		17006479	GTF2H4	0.199795	0.00460456	7.81213	7.48206	0.330067
		16996054	OTTHUMG00000162408	0.387708	0.0490064	6.02219	5.69262	0.329568
		16918384	CDK5RAP1	0.194456	0.00245824	7.61856	7.28931	0.329256
		16841605	OTTHUMG00000178589	0.318435	0.0227256	5.58592	5.2569	0.329017
		17064220	ATP6V0E2-AS1	0.25921	0.0129268	7.78341	7.45483	0.328582
		17093147	APTX	0.320424	0.0229217	7.81348	7.48529	0.328194
		16963913	CTBP1-AS2	0.294324	0.0168361	7.1911	6.86486	0.326244
		16920180	SPATA2	0.318331	0.0266593	6.43956	6.11379	0.325776
		16911698	CSRP2BP	0.363031	0.0385655	7.84372	7.51818	0.325535
		16716369	MIR4679-2	0.192049	0.0357545	3.28152	2.95646	0.325066
		17064854	LMBR1	0.350536	0.0349166	9.90064	9.57628	0.324363
		16758650	GTF2H3	0.235825	0.00573119	8.26111	7.93772	0.323383
		16985992	TNPO1	0.301972	0.0253111	10.3009	9.97815	0.32276
		16945189	SEC61A1	0.196231	0.00209944	11.1173	10.7945	0.322742
		16810633	MTFMT	0.372476	0.0421246	7.84887	7.5263	0.322574
		17047176	GTF2I	0.372353	0.0474489	9.87578	9.55344	0.322348
		16853418	ENOSF1	0.243903	0.012114	9.70665	9.38477	0.321883
		16883216	LOC728537	0.371122	0.0395067	6.18376	5.86218	0.321577
		17003034	KIAA1191	0.207573	0.0042639	8.67693	8.35602	0.320911
		17105086	TBX22	0.259066	0.0388195	5.81476	5.49385	0.32091
		16880048	OTTHUMG00000151845	0.173307	0.00215572	4.00071	3.67987	0.320839
		16757806	PRKAB1	0.226164	0.00776233	7.93943	7.61895	0.320478
		16776052	TM9SF2	0.34001	0.0384866	11.8802	11.5599	0.320308
		16864553	EMC10	0.300339	0.0274742	8.62688	8.30688	0.32
		16789926	CCNB1IP1	0.284468	0.0146018	7.11551	6.79569	0.319823
		17093325	UBAP2	0.247839	0.0235759	9.62159	9.3019	0.319687
		17067771	SNORD13	0.358658	0.0373354	13.5047	13.1856	0.319173
		16799814	RTF1	0.17995	0.00147918	9.37566	9.05857	0.317084
		16865876	ZNF542	0.183773	0.00141481	6.25848	5.94427	0.314206
		16980045	LOC100129858	0.344728	0.0332722	6.44233	6.12833	0.313999
		17058672	GTF2IRD2	0.218226	0.00572864	9.07548	8.76247	0.313015
		17098262	MIR601	0.287983	0.0276323	5.55082	5.23844	0.312373
		16992814	FAF2	0.378439	0.0425083	9.44592	9.13505	0.310873
		16910546	OTTHUMG00000151374	0.20922	0.00362307	7.19718	6.88692	0.310256
		16823165	ERVK13-1	0.298909	0.0198653	7.75949	7.44934	0.310154
		16682290	MST1L	0.358162	0.0385708	7.06284	6.75281	0.310024
		16893246	GPR35	0.302058	0.0251097	7.5286	7.21898	0.309617
		16822507	FBXL16	0.358041	0.0404353	6.75859	6.4499	0.308693
		16821193	WWOX	0.237122	0.00955744	7.88584	7.57744	0.308401
		17023758	SLC18B1	0.386203	0.0463613	8.27431	7.96617	0.308139
		16968389	THAP9	0.282982	0.0141669	6.86749	6.55951	0.307979
		16890055	OTTHUMG00000154724	0.311092	0.0206394	4.89903	4.59154	0.307492
		17049692	AP1S1	0.272831	0.0167789	7.03393	6.72665	0.307284
		16935342	MIR4766	0.337933	0.028962	2.81345	2.50785	0.305608
		16810612	SPG21	0.335259	0.0277261	8.33888	8.03424	0.304633
		16769110	ARL1	0.319114	0.0239629	8.57135	8.26732	0.304026
		16719233	OAT	0.319273	0.0316005	7.58469	7.28239	0.302304
		17107643	LINC00894	0.23053	0.00515551	8.00283	7.7008	0.302026
		16872131	SARS2	0.301514	0.0207405	7.89081	7.5892	0.301608
		16865175	NDUFA3	0.172687	0.00150127	8.12244	7.82246	0.299981
		16774675	MED4-AS1	0.26663	0.0120936	4.43438	4.13533	0.299054
		16878768	SLC30A6	0.321906	0.0474749	9.0802	8.7838	0.296407
		16775508	BTF3P11	0.175017	0.00130138	5.05473	4.75865	0.296083
		16984542	MRPS30	0.356705	0.0373582	8.88365	8.58842	0.295231
		16863243	MARK4	0.371092	0.0472799	8.36518	8.07033	0.294855
		17111918	ZMYM3	0.229967	0.0114643	9.17121	8.87651	0.294706
		16923417	AGPAT3	0.387964	0.0473336	8.67587	8.38225	0.293621
		16712960	MTPAP	0.221253	0.00439816	8.7331	8.4399	0.293206
		16780201	RNA5SP35	0.287851	0.0226156	5.0351	4.74198	0.293117
		17075329	LGI3	0.188771	0.00163207	7.55794	7.26519	0.292748
		17077272	OTTHUMG00000164289	0.299262	0.0233654	4.05464	3.76231	0.292332
		16949698	OPA1	0.326061	0.0432775	9.09161	8.79944	0.292169
		16708674	TMEM180	0.193288	0.00327379	7.80246	7.51122	0.291246
		16810037	OTTHUMG00000152880	0.249948	0.0089956	4.06365	3.77359	0.290066
		16989259	OTTHUMG00000163069	0.394186	0.0496573	7.10888	6.81887	0.290011
		16968621	NUDT9	0.236396	0.00572913	7.62292	7.33313	0.289782
		16960740	C3orf33	0.329204	0.0325921	5.16442	4.87583	0.288588
		16866191	ZSCAN1	0.278906	0.01746	7.07323	6.78567	0.287558
		16682631	EMC1	0.233083	0.00769109	8.06788	7.78073	0.287145
		16871161	SLC7A9	0.177026	0.00553856	5.87633	5.59002	0.286312
		16839331	YWHAE	0.35331	0.0367729	9.41528	9.13042	0.28486
		16946016	PCCB	0.303213	0.0197457	8.55313	8.26833	0.284805
		16933667	NIPSNAP1	0.179693	0.00154271	8.39443	8.11094	0.283494
		17062832	ZC3HC1	0.247806	0.0182851	7.3356	7.05222	0.283379
		16660685	TCEB3	0.342603	0.0297086	8.33043	8.04743	0.283006
		16941516	NISCH	0.196175	0.00198401	8.56748	8.28526	0.282222
		16811832	SNUPN	0.26804	0.0135158	8.17956	7.89788	0.28168
		16843142	TEFM	0.298068	0.023564	7.85975	7.57823	0.281516
		16770309	NAA25	0.310487	0.024305	9.04937	8.76803	0.281341
		16690930	ST7L	0.32885	0.0317693	7.6139	7.33323	0.280678
		16772994	IFT88	0.323116	0.0302136	7.77197	7.49135	0.280617
		16990166	HARS2	0.327767	0.0272798	7.92212	7.64171	0.280406
		16973832	LRPAP1	0.27292	0.0439265	7.97638	7.69602	0.280362
		16790529	RBM23	0.167156	0.000135735	8.74125	8.4625	0.278748
		16840885	TMEM107	0.228406	0.0170376	6.9119	6.63344	0.278452
		17043015	IQCE	0.321122	0.0331779	7.65533	7.37755	0.277779
		16973355	LOC100129917	0.377289	0.0419589	8.62522	8.34792	0.277305
		16704648	RNA5SP311	0.37715	0.0424292	4.85594	4.57875	0.27719
		16987565	LNPEP	0.343783	0.0315751	10.7744	10.4976	0.276826
		16749382	MED21	0.175619	0.000999093	8.79229	8.5155	0.276793
		16671786	ASH1L-AS1	0.327903	0.0340781	6.52211	6.24583	0.276279
		16838988	GPS1	0.335502	0.0359122	9.13603	8.85983	0.276201
		16892836	COPS8	0.270235	0.0124197	9.16694	8.89374	0.273197
		16706080	RNA5SP320	0.347342	0.0414495	3.37755	3.10529	0.272257
		17115070	MAGEA3	0.224711	0.0190633	7.0646	6.79249	0.272112
		17002078	GEMIN5	0.382099	0.0485381	8.39625	8.12667	0.269582
		16708699	SUFU	0.356485	0.0343191	8.36765	8.09864	0.269008
		16684447	PEF1	0.303364	0.0430136	8.28119	8.01222	0.268972
		16762413	IFLTD1	0.350479	0.0346594	3.27055	3.00203	0.268522
		17051504	KLHDC10	0.264222	0.0106258	9.33958	9.07106	0.268518
		16761457	TAS2R8	0.289522	0.0193372	3.55059	3.28214	0.268448
		17054040	UBE3C	0.38213	0.0437924	9.10289	8.83516	0.267725
		17080869	TATDN1	0.373304	0.0409801	6.96815	6.70115	0.266998
		16836288	PCTP	0.255259	0.0133307	3.92082	3.65432	0.266498
		16957041	LINC00882	0.310285	0.0231102	6.09175	5.82672	0.265031
		17053654	NUB1	0.263924	0.0166124	8.99534	8.73035	0.26499
		16933580	RASL10A	0.358308	0.0483751	6.04534	5.78156	0.263779
		17096262	ZNF782	0.358153	0.0482388	7.17303	6.90958	0.263445
		16981148	TRIM61	0.390906	0.0484331	7.5829	7.31946	0.263436
		16886126	OTTHUMG00000153617	0.320373	0.0284565	4.97021	4.70857	0.261646
		16686472	PRDX1	0.352785	0.0418841	10.4145	10.1534	0.261101
		16852789	PHLPP1	0.358649	0.0431031	8.52606	8.26503	0.261028
		16780607	LINC00449	0.270108	0.0123225	6.2201	5.95965	0.260442
		17063141	WDR91	0.327404	0.0343454	8.40499	8.1454	0.259591
		17117569	ARL2BPP2	0.366556	0.0385357	3.46674	3.20782	0.258918
		17118417	FP2234	0.387241	0.0463804	7.43695	7.17816	0.258787
		17116681	SPRY3	0.380048	0.044589	6.88149	6.62384	0.257645
		16769868	ALKBH2	0.223094	0.0429228	6.77568	6.51879	0.256893
		16726515	MIR1237	0.280997	0.0180483	6.38862	6.13224	0.256384
		17066381	XPO7	0.263833	0.0261209	9.72869	9.47264	0.256047
		17075314	REEP4	0.382089	0.0474334	7.32267	7.06672	0.255955
		17085040	TRMT10B	0.178282	0.00225894	7.29938	7.04534	0.25404
		17047045	LIMK1	0.385517	0.0451745	7.57741	7.32417	0.253242
		16880704	OTTHUMG00000152702	0.303377	0.0196117	6.16162	5.90838	0.253236
		16869984	EPS15L1	0.203953	0.00236106	9.63043	9.37953	0.250894
		16989369	C5orf24	0.273042	0.0133036	8.40554	8.1555	0.250043
		16878414	MRPL33	0.348426	0.0373726	6.33014	6.08184	0.248297
		16786548	EIF2B2	0.261898	0.0100049	8.34436	8.09648	0.247873
		16681625	EXOSC10	0.253104	0.026017	10.2928	10.0454	0.247414
		16719932	SPRNP1	0.342615	0.030927	4.03407	3.78898	0.245094
		16802281	IQCH	0.182832	0.0196046	5.66913	5.42406	0.245075
		17099484	MED22	0.222593	0.00482102	8.14234	7.89953	0.242803
		16880442	KIAA1841	0.320871	0.0248636	7.36702	7.12529	0.241735
		16909221	LOC654841	0.304693	0.0190768	5.31828	5.07675	0.241533
		16675174	C1orf27	0.328028	0.0288284	8.84416	8.60273	0.241426
		16868443	ZNF562	0.354476	0.0390296	7.52919	7.28832	0.240864
		16834981	MGC57346	0.384582	0.0447272	8.37933	8.14047	0.238865
		16988762	PRRC1	0.287126	0.0156305	10.2772	10.0402	0.23707
		16870788	ZNF626	0.392113	0.0485702	8.36883	8.13284	0.235988
		17014286	OTTHUMG00000015931	0.358228	0.0420272	4.57652	4.34082	0.235699
		16701887	OTTHUMG00000017561	0.386408	0.0479247	6.12646	5.89118	0.23528
		16935178	DNAL4	0.289567	0.0256908	7.11632	6.88445	0.231873
		17017536	EHMT2	0.386505	0.0469606	8.26279	8.03101	0.231779
		16820787	SF3B3	0.388914	0.0475239	10.7091	10.4781	0.231062
		16670404	VPS45	0.310978	0.0205626	9.45434	9.22392	0.230417
		16834302	ATP6V0A1	0.350539	0.0353476	9.54274	9.31252	0.230219
		17049270	PILRB	0.3358	0.0304201	9.23311	9.00455	0.228558
		16807933	LRRC57	0.382196	0.0439214	8.34385	8.11601	0.227834
		17091444	TRAF2	0.182666	0.00318798	7.55707	7.33073	0.226336
		17114752	SPANXN2	0.230407	0.0093219	3.20196	2.97636	0.225598
		17047862	OTTHUMG00000154585	0.298202	0.0212509	4.20256	3.97799	0.224579
		16924145	TPTE	0.386304	0.0464641	10.1406	9.91598	0.22457
		16990096	TMCO6	0.29902	0.0181083	7.89644	7.67251	0.223927
		16802408	FEM1B	0.312341	0.0266484	9.02223	8.79931	0.222923
		16838244	LOC400622	0.287439	0.0190142	6.11225	5.88938	0.222874
		16681451	MIR34A	0.220121	0.00347136	6.84071	6.61858	0.22213
		17030098	OR12D2	0.219075	0.00348726	4.40375	4.18168	0.222074
		16812168	WDR61	0.318346	0.0317797	5.3617	5.13994	0.221756
		16688308	SERBP1	0.248097	0.0115832	10.655	10.4334	0.221541
		16957568	NAA50	0.252669	0.0114901	9.9902	9.76899	0.221212
		16706412	RPS24	0.174239	5.70489e-05	7.83304	7.61249	0.220544
		16823334	MTRNR2L4	0.318269	0.0261043	3.23336	3.01308	0.220284
		16681852	HNRNPCL1	0.318315	0.0410551	3.49053	3.27357	0.216967
		16700703	TOMM20	0.328171	0.0256632	9.2949	9.07876	0.216136
		16697893	LAD1	0.329015	0.0260025	7.62593	7.41023	0.215699
		16677104	RCOR3	0.218156	0.00425292	9.92303	9.70741	0.215623
		16827850	VAC14	0.351132	0.0330596	9.116	8.90102	0.214972
		16757112	ACAD10	0.290163	0.0160939	7.21006	6.99657	0.213482
		17042946	EIF3B	0.384632	0.0472716	8.43494	8.22192	0.213014
		16942187	RPP14	0.252798	0.00875323	8.14922	7.93682	0.212392
		16784412	KTN1	0.372695	0.0419635	9.23024	9.01792	0.212311
		16804658	WDR93	0.248051	0.00937675	5.16987	4.95866	0.211216
		16686695	ATPAF1	0.283362	0.0226807	8.24827	8.0378	0.210474
		16898957	SFXN5	0.226042	0.00494637	7.00856	6.79847	0.210095
		16982979	OTTHUMG00000161703	0.328038	0.0259848	7.90019	7.69015	0.210037
		16997795	VCAN-AS1	0.228896	0.00666988	3.11372	2.90423	0.209489
		17015006	LOC285768	0.280261	0.0194345	5.36116	5.15282	0.208349
		17068814	UBE2V2	0.287746	0.03452	7.49369	7.28535	0.208344
		16955345	HESX1	0.384592	0.0448888	4.2328	4.0251	0.207698
		16769058	DEPDC4	0.2232	0.00464682	3.97578	3.76839	0.207385
		17003468	PROP1	0.318656	0.0222775	6.55246	6.34589	0.206576
		16871567	ALKBH6	0.356475	0.0351016	7.80203	7.59796	0.204072
		16705531	SUPV3L1	0.359992	0.0365656	9.25207	9.04961	0.20246
		16950207	CNTN4-AS2	0.379191	0.043322	4.71515	4.51353	0.201619
		16719159	IKZF5	0.388995	0.049506	9.09849	8.89713	0.201359
		17090161	GPR107	0.218934	0.00659203	9.17855	8.97755	0.200998
		16685099	KIAA0319L	0.168789	0.000172454	8.53976	8.3389	0.200856
		16674557	XPR1	0.311251	0.0210692	9.58458	9.38413	0.200451
		17019924	DEFB112	0.327599	0.0273864	3.65919	3.45972	0.199467
		16722570	GTF2H1	0.322142	0.0434623	9.22859	9.0313	0.197289
		16659650	DNAJC16	0.283927	0.0143437	7.97086	7.77522	0.19564
		16682161	FBXO42	0.328842	0.0274552	8.88725	8.69341	0.193841
		16734779	TRIM68	0.344705	0.0403895	8.13353	7.94003	0.193505
		16987626	LOC100289230	0.263907	0.0164482	6.86577	6.67341	0.192352
		16660228	PQLC2	0.385686	0.0476171	6.36255	6.1711	0.19145
		17107773	VMA21	0.343194	0.0306363	7.69578	7.50649	0.189293
		16992634	OTTHUMG00000163132	0.33654	0.0442898	3.98304	3.79411	0.188929
		17110800	GPKOW	0.304728	0.0191357	8.02863	7.8418	0.186835
		16785582	FAM71D	0.349263	0.0363589	4.16897	3.98245	0.18652
		16693109	POGZ	0.221765	0.00393101	10.2543	10.0681	0.186183
		16932831	MAPK1	0.299189	0.0479877	11.2013	11.0164	0.184957
		16923745	LOC642852	0.298831	0.0194737	7.17959	6.9952	0.184392
		16822762	IFT140	0.318599	0.0248477	7.33708	7.15848	0.178599
		16829738	CTNS	0.375888	0.0410497	7.62196	7.4474	0.174563
		16758998	OTTHUMG00000168468	0.231736	0.00564551	4.21665	4.04258	0.174071
		16664685	RNA5SP48	0.304584	0.0199895	2.80444	2.63221	0.172232
		16993164	LOC100996385	0.366036	0.0394392	7.48396	7.31487	0.169086
		17104450	ARR3	0.307173	0.0234325	5.51254	5.34742	0.165122
		16973588	TMEM129	0.34264	0.0414984	7.57991	7.41581	0.164093
		16981802	OTTHUMG00000160705	0.377069	0.0418235	3.51742	3.35345	0.163973
		16780255	LINC00391	0.393044	0.0495067	5.09876	4.93564	0.163118
		16777965	N4BP2L2	0.318429	0.0423833	9.89839	9.73681	0.16158
		16737751	HARBI1	0.359158	0.0383171	6.4993	6.34001	0.159295
		16761221	CLEC2A	0.378207	0.0428174	4.46855	4.3118	0.156754
		16813900	SNRPA1	0.344882	0.0331352	7.77117	7.61585	0.155322
		16942827	OTTHUMG00000159007	0.382615	0.0453389	3.28157	3.12771	0.153861
		16797326	LOC100507437	0.337729	0.0282015	6.65145	6.49779	0.153661
		16854713	RPRD1A	0.323327	0.0275881	8.93104	8.78182	0.14922
		16928642	TTC28-AS1	0.337397	0.0281991	7.11853	6.97102	0.147513
		16703572	OTTHUMG00000017875	0.348511	0.0355263	5.29698	5.15	0.146985
		16737123	CCDC73	0.222792	0.00504522	3.64268	3.49733	0.145352
		16817090	RBBP6	0.299796	0.0211469	10.0855	9.94393	0.141591
		16815252	FLYWCH2	0.28535	0.0170901	8.3801	8.23909	0.141014
		17098222	DENND1A	0.376876	0.0451615	8.7303	8.5911	0.139196
		16863460	PPP5C	0.300206	0.0221874	8.05639	7.92065	0.135746
		16956080	LMOD3	0.292722	0.016332	5.15556	5.02121	0.134347
		16832751	NSRP1	0.364755	0.0392044	8.3316	8.21019	0.121413
		17002753	FBXW11	0.24627	0.035652	8.27923	8.16523	0.114003
		16919127	LINC00489	0.340911	0.0331175	7.19057	7.08343	0.107137
		16849098	EXOC7	0.323316	0.0312579	8.36915	8.2641	0.105053
		16686233	ERI3	0.318458	0.0267821	7.57262	7.47041	0.102207
		16979833	OTTHUMG00000161221	0.31484	0.0227976	3.47186	3.37085	0.101003
		16987269	OTTHUMG00000162625	0.209174	0.00287555	3.67975	3.59892	0.0808227
		16850437	USP14	0.320954	0.0249406	9.74614	9.668	0.078145
		16767642	LOC100507377	0.358383	0.0353967	4.40081	4.33211	0.0686979
		16915535	OTTHUMG00000032884	0.366154	0.0379747	4.9075	4.85584	0.0516624
		16666775	CLCA1	0.384212	0.0458032	3.76059	3.71373	0.0468569
		RNAs down-regulated in T versus N
		ID	gene	FDR	p-value T-test	median T	median N	log2 fold (T\N)
		17078592	FABP4	0.181852	0.0060681	6.01305	11.0571	-5.04406
		16797409	IGHD	0.252936	0.0147517	8.06595	12.8406	-4.77468
		16900100	IGKV1-5	0.21554	0.00473855	6.15272	10.8767	-4.72402
		16949397	ADIPOQ	0.215629	0.0402591	5.16864	9.5874	-4.41876
		16696120	DPT	0.191531	0.00160424	7.22856	11.4056	-4.17706
		16797487	IGHV1-18	0.223462	0.00432327	6.30482	10.3305	-4.02567
		16871467	HSPB6	0.279895	0.0437604	5.81904	9.70609	-3.88705
		16900148	IGKV2-24	0.196995	0.00464794	8.07653	11.9217	-3.84515
		16797498	IGHG3	0.176518	0.00117271	6.127	9.70388	-3.57687
		17093543	CCL21	0.164991	0.00201408	7.22037	10.7828	-3.56239
		16863287	FOSB	0.186504	0.00138742	8.08174	11.6269	-3.54512
		16696251	SELE	0.199732	0.0284339	5.71087	9.24811	-3.53724
		16984304	C7	0.224775	0.00766014	7.08697	10.5833	-3.49631
		16900104	IGKV1-6	0.229926	0.00999827	8.43554	11.9143	-3.47875
		16882750	IGKV2D-24	0.171606	0.00213504	8.244	11.6615	-3.41753
		16882744	IGKV1D-27	0.177954	0.000271701	6.51803	9.92601	-3.40798
		16900144	IGKV6-21	0.160026	0.000124369	5.42174	8.7621	-3.34036
		16900178	IGKV2-40	0.17766	0.00139018	6.77165	10.0513	-3.27969
		16848123	ABCA8	0.182298	0.00738223	6.03884	9.29952	-3.26067
		16882718	IGKV5-2	0.172194	0.00114255	6.66053	9.89504	-3.23451
		16855723	SERPINB3	0.191667	0.0232285	3.94942	7.08085	-3.13143
		16725252	MS4A1	0.177372	0.00157236	7.23919	10.3346	-3.09544
		16735751	LYVE1	0.22979	0.00667349	6.36749	9.45777	-3.09028
		16849400	SOCS3	0.171305	0.00490335	7.52911	10.5901	-3.06097
		16797353	IGHG4	0.25866	0.016085	9.24531	12.2884	-3.04304
		16882710	IGKV4-1	0.183559	0.00343778	5.67034	8.71113	-3.04079
		16797501	IGHV2-26	0.161945	0.00496782	3.55206	6.56368	-3.01162
		16856299	CFD	0.18942	0.0314272	8.149	11.1509	-3.00191
		16833224	CCL8	0.185385	0.0312387	4.75613	7.74771	-2.99158
		16797599	IGHV3-72	0.175961	0.00197	4.79571	7.78324	-2.98753
		16927810	IGLV2-18	0.209094	0.00341016	7.89294	10.8647	-2.97174
		17087517	NR4A3	0.192178	0.0172096	6.90247	9.8714	-2.96892
		16882774	IGK	0.192113	0.00320485	8.38879	11.3388	-2.94997
		16890540	OTTHUMG00000154833	0.178775	0.0318592	4.05408	6.9874	-2.93332
		16696811	ANGPTL1	0.0916599	9.85384e-06	5.1555	8.05686	-2.90135
		16900132	IGKV1-16	0.224958	0.00892667	10.4665	13.3455	-2.87896
		16927785	GGTLC2	0.19645	0.00367743	9.7288	12.5867	-2.85793
		16900128	IGKV3-15	0.179584	0.00226949	8.46468	11.3149	-2.85021
		16748590	EMP1	0.23955	0.0176715	7.96724	10.802	-2.83473
		16927840	IGLV3-1	0.228307	0.00857859	8.51886	11.3479	-2.82906
		16927806	IGLJ3	0.172317	0.00024128	6.69072	9.51854	-2.82781
		16927869	IGLJ7	0.248229	0.013438	8.8349	11.6095	-2.77457
		17094598	OTTHUMG00000013334	0.176302	0.000848424	6.60108	9.3552	-2.75412
		16786587	FOS	0.174585	0.000792253	9.158	11.9064	-2.74841
		16927787	IGLV3-27	0.160826	0.000443531	6.64081	9.38267	-2.74186
		16927702	IGLV6-57	0.174348	0.00115147	5.77616	8.51198	-2.73582
		16836624	MIR21	0.256752	0.0118406	7.09313	9.82395	-2.73081
		16797494	IGHV3-20	0.175332	0.0015712	7.117	9.8447	-2.72771
		17097072	SVEP1	0.19234	0.00320533	6.36372	9.08626	-2.72254
		16691245	AMPD1	0.188015	0.000619388	4.83795	7.51518	-2.67723
		16882786	IGKV3D-11	0.193018	0.0037723	7.52887	10.1989	-2.67007
		16797559	IGHV3-49	0.178699	0.00119945	4.94029	7.60436	-2.66407
		16914171	PI3	0.221809	0.0395136	6.95693	9.60096	-2.64402
		16913441	NNAT	0.177369	0.00701457	6.5159	9.15604	-2.64015
		16833204	CCL2	0.247886	0.0222263	9.2618	11.8961	-2.63433
		16976821	PPBP	0.174001	0.00173338	4.6384	7.26553	-2.62713
		17068134	TACC1	0.318589	0.0244499	7.41908	10.0408	-2.62172
		16673713	FMO2	0.254139	0.0241485	5.81078	8.42621	-2.61544
		16716371	CH25H	0.292643	0.0203572	7.34455	9.94133	-2.59678
		17095899	ECM2	0.240216	0.0210332	6.12158	8.70604	-2.58447
		16978236	ADH1B	0.258422	0.0457764	5.72743	8.29519	-2.56776
		16814128	HBA1	0.172725	0.01025	7.67736	10.2383	-2.56098
		16903897	NR4A2	0.210036	0.0350833	7.14966	9.65874	-2.50907
		16666738	CYR61	0.297026	0.0172708	8.24853	10.7566	-2.50807
		16956792	ABI3BP	0.247987	0.00843218	7.1862	9.6864	-2.5002
		16943467	NFKBIZ	0.177871	0.00064125	7.34043	9.83301	-2.49258
		17016692	UBD	0.229047	0.0266607	4.24472	6.71219	-2.46747
		16848173	ABCA9	0.206017	0.00993231	7.04689	9.50103	-2.45413
		16848219	ABCA6	0.243011	0.00830258	7.04234	9.46961	-2.42727
		17083433	IL33	0.182721	0.0047101	5.2565	7.68072	-2.42422
		16687875	JUN	0.212912	0.00541867	8.55296	10.9615	-2.40851
		16858710	JUNB	0.193265	0.00187321	9.15755	11.565	-2.40745
		16677278	ATF3	0.17924	0.00284845	6.56763	8.94574	-2.37811
		16927752	IGLV7-43	0.176373	0.000208011	5.92579	8.2938	-2.36801
		16927742	IGLV7-46	0.17463	0.00491856	3.89274	6.25613	-2.36339
		17055447	MEOX2	0.263662	0.0259139	7.01398	9.36269	-2.34871
		16797512	IGHV4-31	0.171387	0.000653541	8.63888	10.9847	-2.3458
		16963113	APOD	0.25132	0.00941253	8.35808	10.7008	-2.34269
		16927821	IGLC1	0.184184	5.32185e-05	8.90183	11.238	-2.33614
		17093536	CCL19	0.234318	0.00717546	9.72632	12.0601	-2.33375
		16797583	IGHA1	0.224301	0.00519927	4.36468	6.69596	-2.33129
		16799315	THBS1	0.343756	0.0321965	9.22251	11.544	-2.32151
		16709128	DUSP5	0.0123164	3.71721e-07	6.64526	8.95184	-2.30658
		17059567	STEAP4	0.287664	0.024523	7.51757	9.81296	-2.2954
		16967771	IL8	0.192537	0.0139765	5.29479	7.57336	-2.27857
		16689332	GBP1	0.109411	8.67514e-06	6.98314	9.25554	-2.2724
		16800921	FGF7	0.217969	0.00394793	5.01915	7.28355	-2.2644
		17012447	LAMA2	0.173532	0.000814594	6.16401	8.38815	-2.22414
		16824258	MYH11	0.23124	0.0188032	7.02082	9.23275	-2.21192
		17114701	CDR1	0.209504	0.00540198	8.88731	11.0954	-2.20812
		16673075	DDR2	0.259669	0.0410472	7.05632	9.2626	-2.20628
		16882726	IGKV1-27	0.199441	0.00445164	9.1259	11.3146	-2.1887
		16990264	PCDHB4	0.168448	0.00132253	5.10194	7.22417	-2.12224
		16751438	NR4A1	0.252292	0.0392759	7.13561	9.24751	-2.1119
		16712086	ITGA8	0.166167	0.000519651	5.77731	7.88804	-2.11073
		16694886	FCRL5	0.225271	0.00454337	5.06767	7.17559	-2.10792
		16760868	SLC2A3	0.166163	0.00104974	6.80996	8.90829	-2.09834
		16967286	STAP1	0.182541	0.00559104	5.76928	7.86727	-2.09799
		16696363	MYOC	0.172065	0.00241289	4.84246	6.92695	-2.08449
		17086386	NTRK2	0.224118	0.0142781	5.60428	7.67662	-2.07233
		17002846	DUSP1	0.239447	0.00664307	9.46333	11.5296	-2.06623
		17074313	DEFA1	0.175413	0.0138691	7.49496	9.52003	-2.02507
		16840245	SCIMP	0.220592	0.00468902	6.76722	8.76431	-1.99709
		17011121	FHL5	0.22607	0.0264439	5.70144	7.69016	-1.98872
		16689354	GBP2	0.166923	0.000177061	7.16256	9.14654	-1.98397
		16989736	EGR1	0.270675	0.0150927	11.1608	13.1218	-1.96099
		17080000	DPYS	0.298155	0.0210686	7.29532	9.24641	-1.95109
		16696217	SELP	0.197139	0.00525438	5.94849	7.88831	-1.93982
		16793936	OTTHUMG00000171168	0.164956	0.000210142	5.85318	7.7793	-1.92612
		16870384	JUND	0.164971	0.00260893	9.35342	11.2748	-1.9214
		16937152	LINC00312	0.23005	0.0302971	4.64712	6.56378	-1.91666
		17110071	SRPX	0.274253	0.0165609	7.09566	8.99825	-1.90259
		16957396	CCDC80	0.327197	0.0274578	6.98202	8.88454	-1.90252
		17012100	PLN	0.253179	0.0238906	6.1805	8.04882	-1.86831
		16697971	LMOD1	0.21278	0.0175641	5.94333	7.80882	-1.86549
		16669278	FAM46C	0.167562	0.000141402	8.1378	9.99691	-1.85911
		16675323	RGS2	0.210117	0.00309797	7.93996	9.79905	-1.85909
		16978354	EMCN	0.247817	0.0321333	6.58788	8.42564	-1.83777
		16754729	ACSS3	0.296038	0.0306525	6.68893	8.51894	-1.83001
		16856803	GADD45B	0.252771	0.0132194	8.94687	10.7672	-1.82028
		17075392	LOC286058	0.148477	0.0016057	4.49491	6.30331	-1.8084
		16668397	GSTM5	0.229532	0.0285551	6.15289	7.95269	-1.7998
		16861997	ZFP36	0.261396	0.0188009	10.7798	12.5732	-1.79344
		16844477	KRT10	0.225676	0.0158852	5.79421	7.57398	-1.77976
		17087109	MIR27B	0.209406	0.0075121	5.98613	7.76512	-1.779
		16860992	CD22	0.217579	0.00332489	6.61394	8.39072	-1.77678
		16775083	OLFM4	0.222113	0.0383606	5.63968	7.37969	-1.74001
		17013851	MYCT1	0.263776	0.0362194	6.5585	8.29054	-1.73205
		16937137	LMCD1	0.298627	0.032623	7.77754	9.5015	-1.72396
		16689330	GBP3	0.176034	0.000704251	3.72406	5.44747	-1.72342
		16768413	DCN	0.298878	0.0194481	6.19077	7.91018	-1.71941
		17015143	TUBB2A	0.24772	0.029224	4.61388	6.29859	-1.68471
		17114288	GPC3	0.175547	0.015036	6.80329	8.48518	-1.68189
		16743751	MMP12	0.21848	0.0323625	4.74633	6.42284	-1.67651
		16795965	FBLN5	0.247745	0.0168592	7.9197	9.59549	-1.67579
		16698801	CD34	0.253686	0.0383459	8.39986	10.0491	-1.64919
		17004167	IRF4	0.17795	0.0207308	6.80701	8.45568	-1.64867
		16761423	YBX3	0.250122	0.022668	7.97663	9.61437	-1.63774
		16797475	IGHV3-13	0.171862	0.000352376	5.53261	7.16005	-1.62744
		16785696	ARG2	0.158609	8.04221e-05	6.16965	7.79365	-1.624
		16984783	GZMK	0.239538	0.017846	6.52287	8.13707	-1.6142
		16673731	FMO1	0.165069	0.000172231	5.5379	7.13969	-1.60178
		16843549	CCL15-CCL14	0.298622	0.0240765	5.46117	7.05861	-1.59743
		16977833	SPARCL1	0.298893	0.0274132	8.59905	10.1732	-1.57412
		16672654	SLAMF7	0.190406	0.000577793	7.12527	8.69753	-1.57226
		16771797	HCAR2	0.205508	0.00255488	5.1966	6.76806	-1.57145
		16797607	IGHV3-74	0.211919	0.00299112	5.7243	7.28811	-1.56381
		16854301	ANKRD29	0.220685	0.0163716	6.72514	8.28016	-1.55502
		17105076	P2RY10	0.228552	0.0286394	7.4225	8.97742	-1.55492
		16833426	CCL4L1	0.176806	0.00598076	7.08283	8.62606	-1.54324
		16848264	ABCA10	0.211798	0.0121054	6.74883	8.29133	-1.54251
		16797423	IGHD2-15	0.2655	0.033445	7.52865	9.06766	-1.53901
		16797579	IGHV4-61	0.221414	0.0149325	8.03972	9.57221	-1.53249
		16862604	CD79A	0.178101	0.00120876	8.93303	10.4653	-1.53226
		16693414	S100A8	0.264429	0.0104161	7.15454	8.68037	-1.52583
		17021323	TBX18	0.254155	0.0281518	6.00046	7.52569	-1.52524
		16942458	ADAMTS9-AS2	0.215139	0.0122984	6.10151	7.61118	-1.50966
		16882746	IGKV2D-26	0.220524	0.0331339	3.40793	4.90795	-1.50002
		16990203	VTRNA1-3	0.162872	0.000719314	5.12812	6.62759	-1.49947
		17114680	MIR505	0.239589	0.0064403	7.30487	8.79731	-1.49243
		16884050	SULT1C4	0.244743	0.00884194	5.73456	7.22491	-1.49035
		17107230	FHL1	0.263868	0.0245299	6.46647	7.95589	-1.48942
		16667760	S1PR1	0.185675	0.00108589	7.23208	8.72056	-1.48849
		16872248	CLC	0.248262	0.0426965	5.5181	7.00161	-1.4835
		16695121	AIM2	0.224622	0.00453147	6.74418	8.22172	-1.47755
		16826738	MT1G	0.186027	0.00641912	5.32837	6.80161	-1.47324
		16805822	OTTHUMG00000171652	0.295877	0.0207962	7.59201	9.05108	-1.45907
		16747261	CD27	0.24365	0.0438714	8.54945	10.0042	-1.45477
		16990261	PCDHB3	0.226251	0.0114049	5.17589	6.62672	-1.45083
		16778067	DCLK1	0.29987	0.0340799	6.51347	7.95563	-1.44216
		16797368	OTTHUMG00000164793	0.218876	0.00680595	7.45827	8.8953	-1.43703
		16890556	OTTHUMG00000154838	0.323082	0.0339884	6.34372	7.77239	-1.42867
		16672373	PYHIN1	0.247832	0.012991	7.07534	8.50165	-1.42632
		16781901	TRAV16	0.264056	0.0105986	6.79326	8.21895	-1.42569
		16789790	KIAA0125	0.183844	0.00129184	7.09701	8.51659	-1.41958
		16706233	OTTHUMG00000018491	0.179773	0.00870856	5.39977	6.79457	-1.39479
		16722321	PDE3B	0.244158	0.0100961	6.52319	7.91571	-1.39252
		17022980	FAM162B	0.190298	0.0143968	6.90096	8.29272	-1.39175
		16768297	DUSP6	0.283741	0.0174211	7.74241	9.13125	-1.38884
		16721307	OR52N4	0.190415	0.00314416	4.86456	6.24506	-1.3805
		16781830	TRAJ17	0.335633	0.0349958	6.67496	8.05404	-1.37909
		16797535	IGHV3-43	0.20734	0.00281544	6.35187	7.73096	-1.37909
		16889807	CD28	0.322737	0.0308372	7.82897	9.18433	-1.35535
		16969911	ANK2	0.306833	0.0388601	6.25595	7.60942	-1.35347
		16927790	IGLV3-25	0.173465	3.9951e-05	7.54537	8.87934	-1.33398
		16780592	GPR183	0.224928	0.00507979	8.59512	9.9276	-1.33248
		16676764	CD55	0.243177	0.0389935	8.25531	9.58236	-1.32705
		16951797	EOMES	0.247543	0.0158148	6.42375	7.75058	-1.32683
		17012859	PDE7B	0.168796	0.00019346	7.72561	9.04927	-1.32366
		17099703	MIR3689E	0.241537	0.0136067	4.19701	5.51999	-1.32298
		16969267	BANK1	0.342933	0.0315315	6.92845	8.24078	-1.31233
		16753767	IFNG-AS1	0.19552	0.00917319	5.51196	6.81724	-1.30528
		17095703	NFIL3	0.216335	0.00386818	6.57602	7.87712	-1.30109
		16731654	TAGLN	0.265763	0.0139465	7.64754	8.94408	-1.29655
		16991208	GPX3	0.324058	0.0343417	5.07883	6.36726	-1.28843
		16692775	MCL1	0.175668	0.0008501	8.89583	10.1826	-1.28674
		16952883	LTF	0.204464	0.0034359	5.72035	6.99641	-1.27606
		17104313	AR	0.298668	0.0179069	6.93384	8.2074	-1.27356
		16852824	SERPINB12	0.247789	0.00781774	5.3434	6.61231	-1.26891
		16723653	CD44	0.232967	0.00792105	7.62571	8.88886	-1.26315
		16960304	CP	0.221951	0.030267	4.76538	6.02563	-1.26025
		16693427	S100A7	0.194044	0.00301979	4.81142	6.06677	-1.25535
		16664388	CYP4X1	0.288958	0.019578	6.06278	7.29803	-1.23525
		16779667	PCDH9	0.270338	0.0174454	7.5005	8.73467	-1.23417
		17012313	NCOA7	0.184956	0.00122723	7.6078	8.84181	-1.23401
		16742812	OTTHUMG00000166972	0.281171	0.0141739	5.46626	6.69889	-1.23262
		16906308	TFPI	0.182595	0.00760912	6.51256	7.73218	-1.21962
		16797433	IGHG1	0.164127	0.000158409	8.5275	9.74412	-1.21662
		16755056	PLEKHG7	0.175799	0.00191657	5.10194	6.31646	-1.21452
		16764907	KRT6C	0.222853	0.0112236	4.25061	5.46173	-1.21111
		16985950	MAP1B	0.353191	0.0449616	7.82896	9.03342	-1.20446
		16842237	SNORD3C	0.305291	0.0192091	10.385	11.5799	-1.19487
		16767837	CSRP2	0.204172	0.0138543	7.33862	8.52033	-1.18172
		17044758	C7orf41	0.17975	0.00925676	6.85749	8.03166	-1.17417
		16694980	FCRL1	0.283016	0.0285064	6.37892	7.55257	-1.17366
		16711280	KLF6	0.256642	0.00944066	9.43902	10.6045	-1.16552
		16927793	IGLV2-23	0.193268	0.00221045	5.0506	6.21342	-1.16282
		16878994	RASGRP3	0.192558	0.00177831	6.09921	7.26001	-1.16081
		16694928	FCRL3	0.359293	0.0407645	7.32874	8.47612	-1.14738
		16945543	COL6A6	0.161342	0.000501568	6.24931	7.39273	-1.14342
		16975234	TMEM156	0.252755	0.046119	6.15265	7.29582	-1.14316
		16980096	TBC1D9	0.290043	0.0291816	7.59284	8.73424	-1.14141
		16779958	EDNRB	0.263724	0.0348377	7.93031	9.06738	-1.13707
		17115868	IL3RA	0.247819	0.0458328	6.50951	7.63743	-1.12791
		16858830	IER2	0.171119	0.00267013	7.61726	8.74251	-1.12525
		16868481	OLFM2	0.246448	0.0196461	7.11901	8.24372	-1.12471
		16739208	FTH1	0.295881	0.0174021	8.4352	9.55856	-1.12336
		16935512	TNFRSF13C	0.186659	0.00180598	7.17756	8.29923	-1.12167
		17066921	ADAM28	0.346723	0.0359091	8.25672	9.37814	-1.12142
		17051943	TMEM140	0.220717	0.0382313	7.36555	8.48148	-1.11593
		16900112	IGKC	0.165475	0.000142354	5.84281	6.95767	-1.11486
		17075448	TNFRSF10D	0.21589	0.0197466	6.83034	7.94407	-1.11373
		16904410	FIGN	0.270933	0.0456324	5.13476	6.24788	-1.11311
		16699533	DUSP10	0.165067	0.00017178	7.68529	8.79836	-1.11307
		16742814	RAB30	0.196485	0.00200359	6.67044	7.77059	-1.10015
		17001846	CCDC69	0.199422	0.00231216	6.99209	8.08958	-1.09749
		17010760	NT5E	0.175105	0.00486308	5.99605	7.09318	-1.09713
		16889958	ZDBF2	0.262568	0.0147179	6.69229	7.78859	-1.0963
		16843602	CCL3L3	0.125585	0.000118862	7.47091	8.56514	-1.09424
		16927734	IGLV9-49	0.170663	0.000238534	6.02213	7.11584	-1.09371
		16990304	PCDHB12	0.239733	0.0100605	6.00633	7.09894	-1.09261
		16659238	TNFRSF1B	0.254734	0.0426166	8.01633	9.10775	-1.09143
		16955690	FEZF2	0.215572	0.0328873	4.83561	5.91513	-1.07952
		16721535	ZNF215	0.263723	0.023561	5.73606	6.81538	-1.07931
		16676819	CR1	0.337584	0.0433459	6.00603	7.0842	-1.07817
		16887589	CYBRD1	0.374654	0.0457729	9.65678	10.7291	-1.07234
		16783124	COCH	0.222109	0.0391311	5.38936	6.45932	-1.06997
		16852389	DCC	0.310941	0.029493	6.0156	7.08214	-1.06654
		16753533	RASSF3	0.163922	0.00157055	7.97921	9.03301	-1.0538
		16762146	KCNJ8	0.221517	0.0415783	5.28023	6.334	-1.05376
		17020942	FILIP1	0.278802	0.0397202	6.37483	7.42656	-1.05173
		16814121	HBA2	0.163127	6.73106e-05	7.61254	8.66421	-1.05167
		17112498	POF1B	0.244269	0.0175564	4.4149	5.46463	-1.04973
		16927827	IGLV3-9	0.229926	0.00983953	7.94285	8.99036	-1.04751
		17062945	LOC646329	0.205366	0.00239875	8.53339	9.5734	-1.04001
		16946707	AGTR1	0.21769	0.021711	5.80545	6.84097	-1.03552
		16817489	CD19	0.17537	0.00198285	6.52354	7.55859	-1.03504
		16705507	SRGN	0.188054	0.000717631	10.6139	11.6473	-1.03335
		16960585	IGSF10	0.174353	8.46897e-05	5.84888	6.88076	-1.03188
		16718232	ITPRIP	0.162132	0.000102399	7.21866	8.24714	-1.02848
		16774762	RNU6-60	0.335459	0.0385798	5.16519	6.19313	-1.02795
		16938707	CCR4	0.239956	0.00831432	6.92921	7.94621	-1.017
		16786058	SNORD56B	0.308525	0.0199161	6.59171	7.60763	-1.01592
		17093973	PAX5	0.19615	0.0207417	6.6055	7.61725	-1.01175
		16754646	PTPRQ	0.229004	0.0446833	4.09529	5.10404	-1.00875
		17005001	CD83	0.192588	0.00170812	8.9096	9.91599	-1.00639
		16684326	MIR4420	0.185164	0.00139663	6.14658	7.14924	-1.00266
		16948540	B3GNT5	0.231459	0.0496998	6.41482	7.41378	-0.998957
		16714776	EGR2	0.21605	0.00362412	6.82221	7.81457	-0.992362
		16960807	CCNL1	0.190626	0.000529932	9.32111	10.3131	-0.992038
		16938133	GALNT15	0.263933	0.0364915	6.2669	7.2579	-0.991
		17024285	CITED2	0.230013	0.0058388	8.67254	9.66074	-0.988197
		16927739	IGLV1-44	0.239535	0.0105701	2.88943	3.87735	-0.987917
		16774724	CYSLTR2	0.192083	0.00236495	5.94696	6.93247	-0.985517
		16877555	RHOB	0.248329	0.013158	8.44568	9.42779	-0.982113
		16781860	YME1L1	0.348481	0.0492274	7.17798	8.15847	-0.980492
		17017935	HLA-DOB	0.190296	0.013062	7.87592	8.8547	-0.97878
		16692772	C1orf138	0.298094	0.0483769	7.44857	8.42174	-0.973171
		16768438	BTG1	0.268103	0.0185767	7.66658	8.63802	-0.971438
		16957795	CD80	0.183453	0.00992183	5.88738	6.85766	-0.970279
		17116187	RNA5-8SP6	0.21839	0.00373464	7.99132	8.96021	-0.968889
		17075973	DUSP4	0.190196	0.00456683	5.75596	6.7181	-0.962143
		16999776	IRF1	0.193019	0.00290575	7.48473	8.44408	-0.959351
		16694960	FCRL2	0.334779	0.0299495	5.96393	6.92288	-0.958951
		16900191	OTTHUMG00000155081	0.263635	0.0102546	7.76246	8.71637	-0.953907
		16882999	ARID5A	0.172271	0.000175459	7.70648	8.65626	-0.949782
		16664359	CYP4B1	0.169541	0.00057038	6.39061	7.33839	-0.947779
		17079210	GEM	0.31723	0.0273346	6.88272	7.82766	-0.944939
		16666965	LRRC8B	0.223256	0.0147585	7.64748	8.59103	-0.943546
		16698697	FAIM3	0.30786	0.0399831	8.65411	9.59581	-0.941693
		17081401	NDRG1	0.243157	0.0228715	8.34194	9.27902	-0.937083
		16944199	TIGIT	0.161117	0.00787342	5.76808	6.70516	-0.937079
		17085635	PIP5K1B	0.209809	0.00285234	5.77204	6.70589	-0.933852
		17081447	ST3GAL1	0.270479	0.0494601	7.80437	8.7262	-0.921838
		16702767	VIM	0.267949	0.0476371	10.1048	11.022	-0.917179
		16797542	IGHM	0.174435	0.00077756	4.41533	5.33222	-0.916894
		16891843	SP140	0.229804	0.00510725	6.8103	7.72669	-0.916394
		16968878	MMRN1	0.240234	0.0235529	5.77376	6.68847	-0.914711
		16690925	OTTHUMG00000012183	0.190603	0.00171229	6.00219	6.91592	-0.913728
		17015084	SERPINB1	0.17254	0.000265829	8.71347	9.62363	-0.910162
		16933535	XBP1	0.26317	0.0227309	8.92754	9.83408	-0.906538
		16951508	ZNF385D	0.263825	0.0300086	4.43708	5.33937	-0.902282
		16977309	RASGEF1B	0.176091	0.00198896	7.23198	8.13421	-0.902227
		16761811	ART4	0.22209	0.00465938	5.94306	6.84299	-0.899934
		16832005	SNORD3B-1	0.240155	0.00633589	12.0679	12.965	-0.897064
		17061106	RASA4	0.274041	0.0173619	9.10558	10.0019	-0.896351
		16970001	UGT8	0.209812	0.00630024	5.68589	6.58149	-0.895601
		17110670	PIM2	0.216074	0.00406852	7.72034	8.61441	-0.894074
		16913666	PPP1R16B	0.182443	0.00164877	7.55086	8.43602	-0.885162
		16698466	NUAK2	0.220556	0.0118964	6.62124	7.50392	-0.882679
		16995771	C6	0.192316	0.0141757	5.6979	6.57922	-0.881319
		16927690	IGLV4-69	0.222803	0.0197007	5.61002	6.49097	-0.880951
		16832031	SNORD3A	0.243678	0.00675108	12.0765	12.9546	-0.878145
		16888554	FAM171B	0.3342	0.0272143	7.65315	8.53102	-0.87787
		16960084	SLC9A9	0.291773	0.0339062	8.41851	9.2913	-0.872791
		16821330	PLCG2	0.250593	0.0187846	8.07054	8.94319	-0.872644
		16731754	IL10RA	0.2445	0.0221254	8.8845	9.75217	-0.867678
		17104947	SLC16A2	0.298805	0.020462	7.70658	8.56757	-0.860981
		16847719	CD79B	0.24375	0.0292335	7.19996	8.05861	-0.858652
		16900441	DUSP2	0.270777	0.0175889	8.36321	9.22072	-0.857514
		17012140	RNA5SP215	0.328602	0.0411867	4.73574	5.59216	-0.856416
		17022545	METTL24	0.252866	0.0109458	5.92849	6.78407	-0.855587
		17105694	BEX4	0.218762	0.00652329	8.23101	9.0852	-0.854189
		16940172	CCR2	0.196961	0.00983199	6.33195	7.18347	-0.851524
		17055804	FAM126A	0.190473	0.00151682	6.70242	7.55316	-0.850744
		16755049	C12orf74	0.294322	0.0210727	5.30626	6.15602	-0.849753
		17022691	FYN	0.277764	0.0133442	8.18259	9.03087	-0.848274
		16872447	SERTAD3	0.212821	0.0285101	6.92616	7.77228	-0.846115
		16750325	ANO6	0.246515	0.00795565	10.6144	11.4598	-0.845348
		16729217	OTTHUMG00000165321	0.221085	0.00474857	6.58264	7.42677	-0.84413
		16947287	TIPARP	0.312722	0.0216771	8.4492	9.29291	-0.843714
		16852833	SERPINB13	0.22921	0.0353924	3.96827	4.79893	-0.830662
		16831878	KRT17P2	0.334693	0.0308717	6.64245	7.4728	-0.830345
		16886174	KYNU	0.321684	0.0373716	6.39583	7.22477	-0.828947
		17114520	ARHGEF6	0.348652	0.0326149	9.24205	10.0704	-0.828338
		16844200	MIEN1	0.183807	0.00760072	7.95729	8.78339	-0.826102
		16847760	ICAM2	0.234492	0.0373275	8.61391	9.43974	-0.82583
		16972076	NPY5R	0.206075	0.0218214	5.07117	5.8929	-0.82173
		16700507	LINC00582	0.15912	0.00225458	6.50268	7.31911	-0.816431
		16880414	REL	0.163715	0.000277768	9.44337	10.2597	-0.816316
		16830575	SNORD10	0.234019	0.00555383	9.1871	10.0031	-0.815966
		16896650	SRSF7	0.174784	0.00131379	9.50813	10.3235	-0.81534
		17072669	MYC	0.298792	0.0417448	7.92564	8.74086	-0.815219
		16969229	DAPP1	0.174277	0.00417495	7.06199	7.87692	-0.814933
		16913065	PROCR	0.269737	0.0300298	6.07121	6.88192	-0.810708
		16873632	SLC1A5	0.209091	0.0215221	7.85472	8.66243	-0.807708
		16672669	LY9	0.259966	0.0211382	7.87153	8.67641	-0.804883
		16837191	PITPNC1	0.178977	0.00178408	9.02836	9.83313	-0.80477
		17040488	HLA-E	0.175918	0.0137045	11.0401	11.8432	-0.803077
		16711952	FAM107B	0.176355	0.00494867	7.08069	7.88072	-0.800021
		16664005	PLK3	0.245358	0.0490226	7.62719	8.42484	-0.797643
		16697196	FAM129A	0.209249	0.00284324	7.34748	8.14285	-0.795368
		16851486	LAMA3	0.342729	0.0315552	7.41911	8.2124	-0.793292
		16989977	CYSTM1	0.192963	0.0118885	7.64447	8.437	-0.792526
		16980716	TMEM154	0.299083	0.0269104	7.17712	7.96963	-0.792509
		16797419	IGHJ1	0.190193	0.0181687	8.45612	9.24729	-0.791171
		16851383	GATA6	0.347329	0.0356671	7.2	7.99007	-0.790077
		16747623	PTPN6	0.220551	0.0277835	8.21353	9.00331	-0.789787
		16959007	PLXND1	0.239447	0.00797965	8.41144	9.19816	-0.786726
		16841817	KRT17P1	0.332537	0.0269059	6.4163	7.20085	-0.784548
		16665757	PDE4B	0.177507	0.000911756	5.84878	6.63328	-0.784502
		16765226	ITGB7	0.269956	0.0327697	6.99623	7.77891	-0.782679
		16912130	CST7	0.256807	0.0489553	8.70422	9.48444	-0.780223
		16674292	RALGPS2	0.212565	0.00301912	7.96785	8.7462	-0.77835
		17014651	CCR6	0.216252	0.0151506	6.05994	6.83345	-0.77351
		16661497	THEMIS2	0.24849	0.0122398	8.56704	9.3387	-0.771652
		16732807	VWA5A	0.21016	0.00286245	6.64575	7.41717	-0.77142
		16760736	RBP5	0.261677	0.0160802	7.51565	8.28365	-0.767995
		16824706	DCUN1D3	0.32301	0.0444742	7.77693	8.54449	-0.767558
		16881594	ACTG2	0.247902	0.0223889	4.34023	5.10735	-0.767117
		16718622	ABLIM1	0.188412	0.00120721	8.57921	9.34093	-0.761724
		17113463	LRCH2	0.209072	0.00380951	4.81429	5.57565	-0.761367
		16911338	PLCB4	0.266573	0.0139476	7.56525	8.32629	-0.761044
		16844793	KRT9	0.205676	0.00338481	5.34188	6.10261	-0.760729
		16801376	LINC00926	0.194807	0.00303019	7.5015	8.26119	-0.759684
		16843578	CCL3	0.213889	0.0057129	6.15205	6.91106	-0.759006
		17046393	LOC401357	0.176872	0.00172985	6.49626	7.25344	-0.757175
		16818446	OTTHUMG00000176557	0.170105	0.00385428	7.56836	8.32451	-0.756153
		16703242	OTUD1	0.378265	0.0497202	6.53145	7.28568	-0.754232
		16711501	IL2RA	0.306431	0.0198508	6.79768	7.5519	-0.75422
		16837754	MRPS7	0.194034	0.000497124	8.75147	9.50292	-0.751448
		16705247	NRBF2	0.189771	0.00377145	7.96816	8.71864	-0.750475
		16864059	CD37	0.249498	0.011537	9.8993	10.6492	-0.749861
		16858970	CD97	0.207272	0.00562758	8.84715	9.59692	-0.749768
		16915064	FAM209A	0.298886	0.0458095	5.16542	5.9121	-0.746673
		16955155	SELK	0.172866	0.00173679	6.68193	7.42684	-0.744915
		16679349	KMO	0.247551	0.00801658	5.84021	6.58415	-0.743943
		16995802	PLCXD3	0.174444	0.00107568	6.07342	6.81643	-0.743012
		17026267	TNF	0.22894	0.0401156	6.49092	7.23206	-0.741138
		17050765	KCND2	0.356774	0.0498818	5.92755	6.66635	-0.738802
		16780069	SPRY2	0.20605	0.0261289	7.57296	8.31064	-0.737685
		16761830	ERP27	0.26765	0.0150017	7.701	8.43785	-0.736856
		16998059	ARRDC3	0.251919	0.00817577	10.0497	10.7851	-0.735455
		17103991	RNA5SP505	0.173984	0.000688519	4.67137	5.40623	-0.734864
		16833708	LASP1	0.178661	0.00107427	8.84358	9.57509	-0.731514
		17011279	PRDM1	0.327223	0.0253477	7.493	8.22418	-0.731187
		16929677	CSF2RB	0.230106	0.0164462	7.23738	7.96855	-0.73117
		17011572	SMPD2	0.180684	0.00861095	7.68186	8.41168	-0.729821
		16943749	FLJ25363	0.229026	0.0055025	4.16422	4.89252	-0.728301
		17005515	TRIM38	0.177991	0.000628139	9.09361	9.82063	-0.727021
		17079005	TMEM55A	0.255168	0.0111871	7.48995	8.21545	-0.725497
		17097941	TRAF1	0.340445	0.0394296	6.57818	7.30075	-0.722575
		16874267	OTTHUMG00000184009	0.238177	0.00654376	7.10856	7.8296	-0.721038
		16882285	VAMP5	0.218547	0.00806636	8.24675	8.96689	-0.72014
		16977820	HSD17B11	0.323028	0.0459137	9.14667	9.86657	-0.719896
		16871359	DMKN	0.328783	0.028118	6.90172	7.62016	-0.718441
		16968293	LOC100506035	0.203312	0.002365	5.75206	6.46582	-0.713766
		16700058	ITPKB	0.303009	0.0323151	8.57657	9.29002	-0.713451
		17047086	MIR590	0.358553	0.0454241	7.24219	7.95366	-0.711472
		16900174	IGKV1-39	0.178107	0.0122306	7.04349	7.75351	-0.710027
		16791898	CFL2	0.377158	0.0463242	7.10386	7.8132	-0.709335
		16795943	TC2N	0.231823	0.0110709	9.83642	10.5457	-0.709275
		16740326	FAU	0.171406	3.27886e-05	6.91978	7.62867	-0.708893
		16845123	OTTHUMG00000132657	0.283141	0.0163941	7.63557	8.34401	-0.708439
		17065750	BLK	0.221036	0.00535645	6.86049	7.56871	-0.708221
		16698684	IL10	0.162632	0.00350797	5.63718	6.34496	-0.707775
		16900108	IGKV3-7	0.221092	0.004127	6.83891	7.54632	-0.707413
		16786060	LOC145474	0.343018	0.0480705	6.91008	7.61546	-0.705379
		16830754	KDM6B	0.304478	0.0404136	8.62255	9.3229	-0.700341
		16901068	AFF3	0.297297	0.0190398	7.68334	8.38177	-0.698431
		16871915	PPP1R14A	0.179947	0.0154199	6.33857	7.03679	-0.698221
		17096030	FBP1	0.227201	0.0339517	5.88088	6.57721	-0.696323
		16768341	ATP2B1	0.209331	0.00345591	8.46994	9.16478	-0.694836
		16707143	ACTA2-AS1	0.174697	0.0151329	6.76897	7.46265	-0.69368
		16995866	FLJ32255	0.270683	0.0172986	8.29516	8.98661	-0.691449
		16907641	KLF7-IT1	0.363108	0.041968	7.2827	7.97395	-0.691246
		16775377	RNY1P8	0.29924	0.0224225	4.0947	4.78389	-0.689195
		17068136	OTTHUMG00000164068	0.279866	0.0135511	7.24361	7.93194	-0.688329
		16797425	SKAP2	0.2409	0.00755501	2.72691	3.41476	-0.687851
		16933766	OSM	0.277433	0.0481588	5.4331	6.12086	-0.687761
		16828826	COTL1	0.231053	0.00808681	8.72164	9.40805	-0.686414
		16889938	EEF1B2	0.176902	0.000360232	8.08386	8.76975	-0.68589
		16894311	ITGB1BP1	0.26394	0.0469338	6.95029	7.63547	-0.685186
		16834931	FMNL1	0.178618	0.00121996	8.57864	9.26351	-0.68487
		16778731	SNORA31	0.282845	0.0146225	6.28042	6.96197	-0.681558
		17101543	TMSB4X	0.205993	0.0065826	9.20995	9.89123	-0.681275
		16934709	IL2RB	0.318396	0.0257207	8.48657	9.16778	-0.681212
		16825539	C16orf54	0.183916	0.00141667	7.47223	8.15297	-0.680748
		17013809	ESR1	0.20753	0.00743714	6.26923	6.94697	-0.67774
		16867975	FCER2	0.172198	0.00261742	5.9981	6.67495	-0.676844
		17076285	RAB11FIP1	0.254259	0.0091693	7.80199	8.4774	-0.675404
		17059491	ABCB1	0.175905	0.0117168	5.94216	6.61724	-0.675087
		16787008	NRXN3	0.174687	0.000931406	6.48843	7.16337	-0.674943
		17110902	FOXP3	0.182964	0.00883685	7.59441	8.26892	-0.67451
		16833433	CCL4L2	0.380206	0.0446239	6.1164	6.79028	-0.67388
		16812406	STARD5	0.22322	0.00454375	7.74784	8.42169	-0.673841
		16888963	NABP1	0.300638	0.0401238	8.12632	8.797	-0.670681
		16968968	ATOH1	0.195365	0.0127452	6.7864	7.45454	-0.668145
		16930707	MEI1	0.100518	6.72634e-05	6.00055	6.66828	-0.667721
		16864518	SPIB	0.192964	0.000511029	6.83538	7.50061	-0.665225
		16832024	GRAPL	0.349689	0.0322566	8.44779	9.10999	-0.662206
		16849501	CYTH1	0.168561	0.000312624	8.57742	9.23775	-0.660334
		16899109	SLC4A5	0.172702	0.00098686	6.93884	7.59913	-0.660294
		16998162	MCTP1	0.221141	0.0113004	7.72666	8.38657	-0.659914
		16901161	TBC1D8	0.265602	0.0118693	6.66178	7.32007	-0.658289
		16990298	PCDHB11	0.205041	0.00413323	4.54086	5.19855	-0.65769
		16927844	IGLL5	0.318762	0.0270906	7.83962	8.49616	-0.656537
		16669796	TXNIP	0.334596	0.0273331	11.0036	11.6568	-0.653169
		16851801	RNF125	0.338662	0.030299	7.90975	8.56072	-0.650973
		16819355	NLRC5	0.321986	0.0497468	7.81637	8.46532	-0.648951
		16867613	RFX2	0.189027	0.00289709	6.98337	7.63138	-0.648012
		17069212	SDCBP	0.35054	0.0356051	8.08879	8.73679	-0.647999
		16767324	SNORA70G	0.189437	0.00237835	6.90199	7.54552	-0.643529
		16836528	YPEL2	0.222001	0.033744	7.61729	8.25561	-0.638317
		16751381	ACVRL1	0.264185	0.0369822	6.9808	7.61903	-0.638237
		16743577	PGR	0.263892	0.0162746	4.70178	5.33636	-0.634579
		16840321	NLRP1	0.301883	0.0262712	8.20666	8.84099	-0.634329
		16991370	MFAP3	0.211366	0.0165036	6.87711	7.51113	-0.634024
		17098698	FAM102A	0.211474	0.00316211	8.84974	9.48376	-0.634022
		16753270	SLC16A7	0.229708	0.00589518	7.84093	8.46989	-0.628959
		16738329	OR4A5	0.358699	0.0401871	5.16048	5.78626	-0.625785
		17000518	HSPA9	0.37929	0.0446842	6.82332	7.44787	-0.624555
		16878662	YPEL5	0.247671	0.0479768	7.51895	8.14347	-0.624523
		16846913	MTVR2	0.358317	0.040229	5.53821	6.16104	-0.622826
		16867756	TUBB4A	0.2802	0.0350735	4.92045	5.5431	-0.622655
		16940239	PTH1R	0.217621	0.019452	5.89249	6.51494	-0.62245
		17011302	AIM1	0.232944	0.00563278	7.49514	8.11594	-0.620799
		16933049	VPREB3	0.263856	0.015205	6.18919	6.80972	-0.620525
		16671325	RPS27	0.239425	0.0284059	7.57798	8.19782	-0.619839
		16788739	MIR376A2	0.172715	0.00248444	2.87183	3.48827	-0.616434
		16813038	MFGE8	0.356978	0.0404966	8.26823	8.88457	-0.616344
		16979133	CAMK2D	0.231207	0.00595967	7.70945	8.32358	-0.614126
		17054823	ACTB	0.292142	0.0184697	9.24197	9.85558	-0.613615
		16788475	DLK1	0.261248	0.0165245	5.88878	6.5015	-0.61272
		17015652	NEDD9	0.34234	0.0396473	7.208	7.81975	-0.611744
		16709043	RNA5SP325	0.224216	0.00801446	3.47982	4.09134	-0.611525
		16902921	RNA5-8SP5	0.264141	0.0196899	3.55688	4.16555	-0.608676
		17079598	RNF19A	0.252269	0.0107617	8.13339	8.74181	-0.608421
		16831224	MYOCD	0.248137	0.0118451	5.33987	5.94588	-0.606007
		17088997	MIR181B2	0.209064	0.0103964	4.90596	5.51044	-0.604478
		16664754	FAM159A	0.261222	0.0110658	6.29228	6.89675	-0.604473
		16817601	CORO1A	0.342194	0.0330482	8.17414	8.77858	-0.604443
		16778715	TPT1	0.258563	0.0367079	9.42765	10.0309	-0.60322
		16717005	PIK3AP1	0.274837	0.0224649	8.04684	8.64821	-0.601376
		16657445	OR4F5	0.277756	0.0138863	4.72902	5.32926	-0.600242
		16995035	OTTHUMG00000162005	0.220525	0.0034991	4.88369	5.48376	-0.600073
		17103230	SPACA5	0.175039	0.000708169	4.4948	5.09448	-0.599686
		16724215	MAPK8IP1	0.248067	0.0193902	5.28226	5.8766	-0.59434
		16818975	RNA5SP427	0.285434	0.0149119	6.07612	6.67041	-0.594285
		16698883	LAMB3	0.216192	0.00325206	6.16001	6.75302	-0.593011
		17056740	ELMO1	0.245739	0.00981501	8.21715	8.80931	-0.592168
		16874533	NAPSB	0.220882	0.00630229	6.47862	7.07053	-0.591913
		17084866	GLIPR2	0.172933	0.00104641	7.74828	8.33893	-0.590649
		16797340	IGH	0.263793	0.0344248	6.74642	7.33574	-0.589316
		16857905	MARCH2	0.194784	0.0119403	8.0506	8.63936	-0.588759
		16874265	MIR4324	0.221707	0.00403188	7.85961	8.44651	-0.586904
		16872796	CXCL17	0.222191	0.00816572	6.37511	6.96121	-0.586097
		16949403	ST6GAL1	0.18694	0.00414384	7.381	7.96595	-0.584949
		16666471	PTGFR	0.17941	0.00110838	5.33216	5.91708	-0.584912
		17069081	OTTHUMG00000164295	0.248335	0.0217019	4.37247	4.95523	-0.582757
		16943452	NXPE3	0.39215	0.0489784	7.0676	7.64884	-0.581238
		16872528	CYP2A7	0.24867	0.0208512	7.68662	8.26761	-0.580995
		17075506	ENTPD4	0.232957	0.00807888	9.59789	10.1786	-0.580693
		16960560	P2RY14	0.377751	0.0481673	7.56369	8.14284	-0.579149
		16931957	CECR1	0.22973	0.00635375	8.31255	8.89119	-0.578638
		17035371	HCP5	0.277533	0.0148846	9.61404	10.1926	-0.578525
		16927850	IGLJ2	0.196865	0.00195257	6.55704	7.13509	-0.578045
		17112187	MIR421	0.348693	0.0318606	9.59833	10.1756	-0.577217
		17103396	WAS	0.298915	0.0230944	7.98219	8.55765	-0.575465
		16737194	C11orf91	0.185735	0.0105114	6.54814	7.12351	-0.575374
		16884285	LOC440895	0.344713	0.0362402	5.27878	5.85402	-0.575239
		16873087	KCNN4	0.27499	0.0179715	7.57942	8.1537	-0.574277
		16749010	SLCO1C1	0.370907	0.0422981	4.64366	5.21731	-0.573646
		17097560	AKNA	0.386431	0.0470179	8.42683	8.99943	-0.572601
		17063507	JHDM1D	0.371492	0.0430436	8.01841	8.59068	-0.572266
		16712277	ST8SIA6	0.261873	0.012915	4.33261	4.90313	-0.570518
		16935142	SUN2	0.32041	0.0261452	8.23886	8.8092	-0.570338
		16856195	GZMM	0.176313	0.00149796	7.14427	7.71434	-0.570074
		16697750	KIF21B	0.339833	0.0293418	7.91713	8.48706	-0.569928
		16735513	C11orf16	0.221632	0.00502659	6.68772	7.25707	-0.569352
		16715133	PPA1	0.328261	0.0275101	8.12928	8.69513	-0.565845
		16752561	MYL6	0.248502	0.0139315	9.00297	9.56838	-0.565409
		16733377	FLI1	0.272806	0.0330951	8.3659	8.92984	-0.56394
		16889115	COQ10B	0.230369	0.00620374	8.20919	8.77307	-0.563874
		16676008	PPP1R12B	0.17767	0.00478798	8.51174	9.07497	-0.563226
		16933062	DERL3	0.290107	0.0379282	7.51851	8.08155	-0.563044
		16721549	NLRP14	0.20478	0.00234123	5.05179	5.61361	-0.56182
		16866849	MKNK2	0.30469	0.0286365	8.84548	9.40614	-0.560655
		16707096	LIPN	0.252807	0.0158009	5.26125	5.82079	-0.55954
		17015106	SERPINB9	0.356715	0.0350957	8.14094	8.70016	-0.55922
		16898326	PELI1	0.192721	0.000499411	9.57896	10.1375	-0.558517
		16725160	MS4A3	0.262664	0.0320843	4.37845	4.93534	-0.556883
		16957675	LSAMP	0.371707	0.045266	6.63052	7.1873	-0.556774
		16830988	NDEL1	0.221896	0.0279844	9.19577	9.75097	-0.555198
		16713614	MARCH8	0.248146	0.00769112	8.52688	9.08196	-0.555079
		17057134	RASA4CP	0.204115	0.00229189	8.91069	9.46549	-0.554805
		16742963	SYTL2	0.366781	0.0387685	6.74522	7.29603	-0.550802
		16790229	LINC00641	0.223237	0.0049041	7.99936	8.54868	-0.549323
		16945137	ABTB1	0.196907	0.0021556	6.7199	7.26921	-0.549304
		16770124	HVCN1	0.248127	0.0271815	6.63757	7.18062	-0.543053
		17037629	HLA-F	0.237885	0.0225469	8.41285	8.95288	-0.540027
		17049346	PPP1R35	0.17124	0.00110214	6.52485	7.06273	-0.53788
		16755834	MYBPC1	0.208821	0.00617572	4.55579	5.09325	-0.537465
		17007307	PSMB9	0.166714	0.00153756	7.78063	8.31805	-0.537422
		16742831	SNORA70E	0.304388	0.0370289	6.57565	7.11294	-0.537288
		16809827	ALDH1A2	0.265712	0.0110644	5.30601	5.84181	-0.535806
		17015240	ECI2	0.187523	0.00147413	7.15885	7.69451	-0.535658
		16729188	UVRAG	0.171005	0.000475055	9.28152	9.8136	-0.532088
		16743517	MAML2	0.329163	0.0379472	9.29141	9.82336	-0.531952
		16688506	NEGR1	0.370319	0.0399378	8.23342	8.76455	-0.531131
		17002777	STK10	0.298193	0.0439792	8.57454	9.10431	-0.52977
		16752172	OR6C76	0.358632	0.0416888	3.54866	4.07829	-0.529625
		16671416	ATP8B2	0.221113	0.00612058	8.55634	9.08596	-0.529615
		17061298	RELN	0.304214	0.0445492	5.76131	6.2905	-0.529188
		17020059	GSTA2	0.310494	0.0207434	4.22461	4.75347	-0.528853
		16862001	PLEKHG2	0.291902	0.0161813	7.67838	8.20722	-0.528849
		16846504	FAM117A	0.324764	0.0257697	7.31912	7.84796	-0.52884
		16822035	DPEP1	0.323725	0.0315987	7.11034	7.63768	-0.527341
		16776798	F10	0.172748	0.00382768	6.50175	7.02845	-0.526699
		16989195	OTTHUMG00000163048	0.302477	0.0301085	5.18263	5.70927	-0.52663
		16935130	JOSD1	0.170337	0.000341226	8.17209	8.69717	-0.525084
		17000970	FCHSD1	0.218378	0.00514827	7.20889	7.73335	-0.524467
		16957636	ZBTB20	0.247883	0.010512	9.09231	9.61627	-0.523963
		16697686	ZNF281	0.319699	0.033785	8.36739	8.89029	-0.522901
		16668111	KIAA1324	0.19268	0.0153396	6.82663	7.34886	-0.522228
		16847711	GH1	0.243872	0.0183911	4.32648	4.84793	-0.521448
		16754968	RNA5SP365	0.218628	0.016593	6.3301	6.84988	-0.519786
		16864751	FPR2	0.225546	0.00478165	4.08852	4.60653	-0.518004
		16914859	MIR645	0.389059	0.0484569	7.74896	8.26269	-0.513728
		16775785	GPC5	0.217162	0.0116152	4.95862	5.47123	-0.512607
		16872982	LYPD3	0.329619	0.026991	7.05412	7.56627	-0.512152
		16747402	LAG3	0.189519	0.0207881	6.66302	7.17099	-0.507976
		16859562	FAM129C	0.193511	0.00194316	7.23916	7.74677	-0.507614
		16943181	GPR15	0.19518	0.00188159	5.59402	6.09914	-0.505124
		16696614	KIAA0040	0.291966	0.0341979	8.94039	9.44518	-0.504785
		16988931	CDC42SE2	0.221794	0.0232677	7.94325	8.44751	-0.504256
		16818808	NKD1	0.178302	0.00343102	6.58708	7.09132	-0.50424
		16860834	GRAMD1A	0.186535	0.00284381	8.5247	9.0286	-0.503907
		17016946	PPP1R18	0.175374	0.000333616	8.3546	8.85822	-0.50362
		16773493	RASL11A	0.22463	0.00436874	6.62521	7.12844	-0.503228
		16776017	DOCK9-AS1	0.202456	0.00716089	4.79166	5.29339	-0.501723
		16776583	TEX29	0.236807	0.00630311	5.46995	5.97061	-0.500659
		17106214	PAK3	0.228936	0.00548638	5.40148	5.90138	-0.499908
		16914901	RNU7-6P	0.375935	0.0416657	6.69603	7.1958	-0.499769
		16862656	LOC100505639	0.22342	0.00507034	6.17392	6.66983	-0.495906
		16845222	EZH1	0.245826	0.00908525	9.81004	10.3058	-0.49575
		17055970	CYCS	0.375452	0.0409789	6.17141	6.66713	-0.495715
		16872229	RPS16	0.192033	0.00275012	8.50571	9.00123	-0.495516
		16836985	MAP3K3	0.172803	0.000826604	7.85324	8.34817	-0.49493
		16865540	FCAR	0.170027	0.00507938	5.2642	5.75743	-0.493223
		16873581	PRKD2	0.25351	0.0109589	8.98814	9.47856	-0.490421
		16713315	OTTHUMG00000017960	0.20889	0.032539	4.40761	4.89788	-0.490268
		16886883	TANK	0.176392	0.00598259	8.1632	8.65234	-0.489145
		17008461	TREML5P	0.31842	0.0338561	5.55973	6.0477	-0.487967
		17020240	HMGCLL1	0.171988	0.000611052	5.56702	6.05395	-0.486929
		16872561	B9D2	0.245823	0.00821598	7.18955	7.67604	-0.486486
		17081850	GPR20	0.248323	0.0236989	6.2574	6.74385	-0.486443
		17113518	OTTHUMG00000022248	0.218566	0.00558846	5.76672	6.25226	-0.485542
		16738512	SLC43A1	0.281247	0.0223488	7.40953	7.89407	-0.484535
		16896955	OTTHUMG00000152374	0.387547	0.0476892	6.94388	7.42682	-0.482937
		17062255	FAM3C	0.275511	0.0133898	6.78328	7.26589	-0.482608
		16872029	LGALS4	0.239727	0.0311046	7.38592	7.86833	-0.48241
		16677404	PROX1-IT1	0.337425	0.042988	4.75511	5.23561	-0.480506
		16817562	RRN3P2	0.381885	0.0446879	7.24554	7.72373	-0.478193
		16858991	PKN1	0.221303	0.00491391	8.15604	8.63284	-0.476799
		16884967	DBI	0.243549	0.0157732	7.40345	7.87945	-0.476
		16771570	RHOF	0.234117	0.00696664	7.28577	7.76156	-0.475795
		16844239	ORMDL3	0.281819	0.0336398	7.64785	8.12359	-0.475738
		16950304	EGOT	0.174585	0.00192021	5.74334	6.21747	-0.474133
		16663989	RPS8	0.193154	0.0018012	8.32655	8.80046	-0.473915
		16864165	SNORD35B	0.343168	0.0302877	7.9823	8.4552	-0.472906
		17006134	HLA-H	0.287412	0.0218692	5.50974	5.98265	-0.472902
		16896536	CDC42EP3	0.259033	0.0151293	6.44724	6.91817	-0.470936
		16804333	AKAP13	0.23506	0.0063243	8.90306	9.37351	-0.470446
		17017979	TAP1	0.17579	0.000461269	9.21685	9.6868	-0.469945
		16866867	MOB3A	0.265901	0.0376348	10.3022	10.7721	-0.469861
		17104279	MIR223	0.351462	0.0328385	6.24474	6.71458	-0.46984
		16875217	MIR371B	0.217799	0.0217063	6.51776	6.9866	-0.468843
		17109260	PIGA	0.192359	0.00564143	7.88965	8.35712	-0.467469
		16758130	ORAI1	0.199151	0.0151199	7.33609	7.8021	-0.466014
		16682829	CAMK2N1	0.261285	0.0116264	7.0838	7.54974	-0.46594
		17011624	OTTHUMG00000015353	0.183598	0.00288266	6.15254	6.61584	-0.463306
		16873567	GNG8	0.229065	0.00677795	6.34104	6.80354	-0.462502
		17110086	RPGR	0.27776	0.0148584	7.87675	8.33906	-0.462307
		16841829	TNFRSF13B	0.223483	0.00591927	6.82106	7.28203	-0.460965
		16830360	EIF5A	0.266147	0.0116919	6.46379	6.92454	-0.460755
		16734526	CARS	0.174791	0.00363732	7.29249	7.75322	-0.46073
		16779855	MYCBP2	0.27245	0.0259601	9.59987	10.0602	-0.460322
		17001674	RPS14	0.192033	0.000510822	8.00859	8.4685	-0.459904
		17108694	CRLF2	0.220694	0.00374247	5.68834	6.14735	-0.459007
		16998937	TSSK1B	0.275193	0.0131699	4.92088	5.37916	-0.458286
		16872705	POU2F2	0.283588	0.0173162	6.62412	7.08198	-0.457865
		16704154	RET	0.219049	0.0033167	5.67789	6.13465	-0.456756
		16841384	MYH3	0.185732	0.00128859	5.82311	6.27941	-0.456302
		16754452	OTTHUMG00000169920	0.248321	0.0312147	4.73725	5.19315	-0.455908
		16744774	LOC100652768	0.250556	0.016155	7.35443	7.80859	-0.454154
		16830912	MIR3676	0.382122	0.0480746	8.57369	9.02657	-0.452878
		16733288	ST3GAL4	0.301721	0.0316676	6.62069	7.07311	-0.452417
		17014064	ZDHHC14	0.247968	0.0077039	7.53377	7.98609	-0.452322
		16922418	LINC00310	0.215835	0.00393265	6.44381	6.89526	-0.451447
		17107969	ZNF275	0.270007	0.0143424	7.94337	8.39358	-0.450207
		16735869	OTTHUMG00000165726	0.283828	0.0467734	5.3198	5.76921	-0.449409
		16678149	MIXL1	0.316947	0.0237504	6.04713	6.49633	-0.449201
		17084710	CCDC107	0.164588	0.00159553	6.94477	7.39338	-0.448601
		17108740	P2RY8	0.219362	0.00905646	7.61153	8.06008	-0.448545
		17058870	CCL24	0.163845	0.00370628	4.87042	5.3181	-0.44768
		16813029	HAPLN3	0.259254	0.0151582	7.13125	7.5785	-0.447241
		16839030	CSNK1D	0.196634	0.00250254	6.44301	6.88994	-0.44693
		16720771	LSP1	0.187238	0.00147932	7.21593	7.66228	-0.446353
		16974313	MIR3138	0.356621	0.0385557	6.32814	6.77419	-0.446043
		16717102	FRAT2	0.212506	0.00408059	7.20302	7.64875	-0.445732
		16897450	NRXN1	0.247782	0.046179	5.39534	5.84067	-0.445331
		16845096	STAT5B	0.202724	0.00369928	8.45147	8.8954	-0.443938
		16674330	TOR3A	0.209099	0.0124796	7.23699	7.6807	-0.443709
		16747570	ENO2	0.35009	0.0341838	6.61103	7.0544	-0.443372
		16867409	TICAM1	0.222857	0.0115855	7.04199	7.48368	-0.441682
		16766767	CTDSP2	0.316393	0.0301628	9.43836	9.87958	-0.441215
		16738465	PRG2	0.281583	0.0269084	5.52965	5.97041	-0.440753
		16866539	R3HDM4	0.223029	0.00370164	7.95457	8.39488	-0.440304
		16777078	TUBA3C	0.244958	0.0101187	6.64747	7.08761	-0.440139
		16702007	AKR1C3	0.355864	0.0431901	6.02917	6.46922	-0.440047
		16894402	ODC1	0.379696	0.044089	9.38494	9.82448	-0.439536
		17095345	SLC28A3	0.253041	0.0111032	5.56508	6.00425	-0.439174
		17017058	PSORS1C2	0.260067	0.0132169	7.12263	7.56117	-0.438542
		16956661	CLDND1	0.209386	0.00308475	8.99894	9.43719	-0.438252
		16671041	LCE2C	0.230139	0.00626612	4.16666	4.60437	-0.437707
		17105699	TCEAL7	0.21559	0.00404102	6.02419	6.46187	-0.437679
		16683460	CNR2	0.299504	0.0241951	5.82155	6.25809	-0.436541
		16689664	TMED5	0.260314	0.0134678	8.68942	9.12525	-0.435832
		16739455	UBXN1	0.259762	0.0198444	7.98887	8.4235	-0.434631
		16667487	DPYD-AS2	0.174289	5.05279e-05	4.79619	5.23006	-0.433874
		17004721	GCNT2	0.176514	0.00237711	5.51938	5.95126	-0.43188
		16767332	MDM2	0.357743	0.0357459	6.64144	7.07307	-0.431633
		16940190	CCRL2	0.248434	0.00788378	6.81282	7.24414	-0.431325
		16996771	SGTB	0.31872	0.0223296	7.63077	8.06202	-0.431242
		16825535	SLC7A5P1	0.249615	0.00838946	10.2193	10.6502	-0.430888
		16664445	CMPK1	0.209937	0.0138126	9.42052	9.84944	-0.428912
		16974221	OTTHUMG00000170901	0.307803	0.0326575	5.29029	5.71849	-0.428199
		16829835	ARRB2	0.349169	0.0322822	9.65513	10.0826	-0.427483
		17117545	LOC100131541	0.221101	0.00420739	8.46234	8.88944	-0.427105
		16977502	PLAC8	0.389074	0.0498206	8.29631	8.72246	-0.42615
		17074305	DEFA4	0.221001	0.0144803	6.74115	7.16721	-0.426058
		17118376	LOC100130458	0.28806	0.0177404	5.16651	5.59234	-0.425828
		16776096	MIR4306	0.372025	0.0462393	5.05522	5.48035	-0.425127
		16833787	PPP1R1B	0.292091	0.0161087	6.39849	6.82349	-0.424995
		16662685	INPP5B	0.259944	0.0495612	5.90746	6.33226	-0.424803
		16954988	MUSTN1	0.288339	0.0240234	7.87618	8.30092	-0.424739
		17010929	PNRC1	0.259135	0.0386443	11.2483	11.6724	-0.424058
		17073290	GPIHBP1	0.258534	0.0102412	7.24576	7.66828	-0.422519
		17070653	OSGIN2	0.188823	0.00202357	6.95599	7.37815	-0.422164
		16852905	SERPINB8	0.232988	0.00644112	6.38801	6.80946	-0.421446
		16719697	NKX6-2	0.21206	0.00331901	6.99968	7.42089	-0.421217
		16677228	PPP2R5A	0.179172	0.00282863	9.43295	9.85387	-0.420927
		17112623	SYTL4	0.268547	0.0140442	6.24152	6.66206	-0.420536
		17060446	MIR106B	0.262914	0.0437271	6.92452	7.3436	-0.419086
		16696434	LOC100506023	0.268464	0.0123905	7.25297	7.67093	-0.417965
		16779283	DHRS12	0.253325	0.0328366	7.2124	7.63021	-0.417803
		16823041	MIR3180-4	0.304805	0.0313855	7.66027	8.07638	-0.416114
		16921999	LINC00189	0.173584	0.00103925	4.6556	5.07066	-0.415065
		16751900	HOXC13	0.31825	0.0419901	5.99493	6.40992	-0.414992
		16740969	CLCF1	0.263961	0.0220311	7.30761	7.72165	-0.414044
		16924327	C21orf91	0.29671	0.0463708	8.27533	8.68916	-0.41383
		16731166	OTTHUMG00000166913	0.226145	0.00460462	3.45504	3.86869	-0.413651
		16876464	OTTHUMG00000151365	0.223718	0.00820597	6.26533	6.67581	-0.41048
		17020136	GCM1	0.284449	0.0160502	4.96186	5.37232	-0.410456
		16900429	ASTL	0.174967	0.00222222	6.38667	6.79438	-0.407712
		16827387	LOC100505942	0.320328	0.0285442	7.86241	8.2699	-0.407487
		16912309	REM1	0.234366	0.0221941	6.21498	6.62176	-0.406776
		16729035	SPCS2	0.382154	0.0437509	8.44869	8.85498	-0.406282
		16739942	RASGRP2	0.264215	0.0136457	7.09886	7.50507	-0.406212
		16999940	LOC100506102	0.189715	0.00587873	5.3041	5.70973	-0.405622
		16813601	SPATA8-AS1	0.222663	0.0137538	4.88785	5.29305	-0.405193
		17075271	DOK2	0.265767	0.0284145	8.1445	8.54909	-0.404591
		16992557	CPEB4	0.363154	0.0416136	7.74247	8.14688	-0.404407
		16909413	SP110	0.296938	0.0171272	9.08481	9.48909	-0.404282
		16797224	GPR132	0.189757	0.00150743	6.66258	7.06666	-0.404074
		16856906	S1PR4	0.263573	0.0227617	6.89615	7.29986	-0.403711
		16991705	ADRA1B	0.313193	0.0455621	6.1961	6.59897	-0.402868
		16712154	RSU1	0.182302	0.00916159	10.3321	10.7346	-0.402496
		16764964	KRT71	0.239427	0.0066975	6.08292	6.48406	-0.401137
		17009164	CAPN11	0.295598	0.0468326	5.35417	5.75521	-0.401041
		16837609	RAB37	0.343426	0.0395012	7.51895	7.91858	-0.399622
		16853277	NFATC1	0.384576	0.0446835	8.00562	8.40434	-0.398726
		16922011	BACH1	0.349341	0.0363177	7.70929	8.10798	-0.398681
		17118362	LOC100131910	0.363023	0.0494374	6.58257	6.98039	-0.397823
		16859281	HSH2D	0.34082	0.0409751	6.62156	7.01911	-0.397551
		16930132	OTTHUMG00000151089	0.252341	0.0107736	7.12182	7.51928	-0.397451
		17088819	OR1L4	0.382332	0.0477537	4.38222	4.77741	-0.395194
		16878731	EHD3	0.239695	0.0157702	6.55936	6.95406	-0.394708
		16720370	EFCAB4A	0.234138	0.023867	6.40545	6.79748	-0.392023
		16709223	SHOC2	0.188682	0.00306217	9.87312	10.265	-0.39193
		16695602	B4GALT3	0.294339	0.0421898	8.05648	8.44703	-0.390553
		16934901	SLC16A8	0.176945	0.000272734	6.31155	6.70134	-0.389791
		16751750	PFDN5	0.290451	0.0447243	8.13761	8.52638	-0.388771
		16871531	NFKBID	0.183698	0.00150988	8.19462	8.58174	-0.387117
		16988639	OTTHUMG00000163006	0.218732	0.00496647	3.92639	4.31209	-0.385705
		16668288	AMPD2	0.226097	0.0077023	7.60164	7.9873	-0.385654
		16926383	KRTAP10-1	0.251935	0.0094176	6.97675	7.36201	-0.385259
		16880648	LOC100507006	0.318754	0.0219969	7.36493	7.75013	-0.385199
		16962519	ADIPOQ-AS1	0.24037	0.00933464	4.81951	5.20454	-0.385036
		17004879	HIVEP1	0.218451	0.00935072	8.81838	9.20223	-0.383856
		16728857	PLEKHB1	0.299364	0.0217633	7.02684	7.40958	-0.382744
		16689060	BCL10	0.209377	0.0149645	8.09133	8.47257	-0.381234
		16830484	SLC35G6	0.384504	0.0445302	4.81871	5.19974	-0.381035
		17068349	C8orf4	0.288768	0.0229224	5.63577	6.01659	-0.380813
		17018654	CPNE5	0.319459	0.0240295	6.36699	6.7471	-0.380107
		16763882	ASB8	0.19628	0.00193277	7.24986	7.62893	-0.379073
		16837362	LOC388414	0.339862	0.045563	5.3774	5.75588	-0.378486
		17103754	MIR502	0.229972	0.00982977	7.66798	8.04608	-0.378098
		16781464	OR4K17	0.28969	0.0487578	4.37039	4.7476	-0.377206
		17078722	CA1	0.245828	0.00991082	4.19145	4.56764	-0.376193
		16908711	TUBA4A	0.252964	0.00891379	7.42658	7.80214	-0.375557
		17102755	DDX3X	0.366635	0.04385	9.99616	10.371	-0.374868
		16872227	MIR4530	0.343002	0.0312117	7.01372	7.38831	-0.374594
		16871349	KRTDAP	0.269856	0.0320464	6.92463	7.29918	-0.374549
		17013650	ULBP2	0.384439	0.0471685	6.24763	6.62011	-0.372478
		16900116	IGKV1-9	0.179583	0.00787048	7.08448	7.45639	-0.371915
		16862895	ZNF222	0.358404	0.0400281	3.8721	4.24401	-0.371905
		16972950	ANKRD37	0.277262	0.0216553	6.9632	7.33333	-0.370125
		16890787	GPBAR1	0.24396	0.0318867	6.38198	6.75199	-0.370003
		16740037	MAP4K2	0.335387	0.0437281	7.61352	7.98297	-0.369452
		17017286	C6orf47	0.211738	0.015714	7.19816	7.56745	-0.369289
		17067393	PNOC	0.26354	0.0111357	6.65789	7.02674	-0.368844
		17065423	FAM90A10P	0.22452	0.00450313	6.8972	7.26493	-0.367734
		16707503	EXOC6	0.33584	0.0277103	8.30344	8.67103	-0.36759
		16825391	SULT1A1	0.342833	0.0306979	6.76852	7.13586	-0.367335
		17048724	BHLHA15	0.339592	0.0295896	7.80683	8.17348	-0.366655
		16864141	RPL13A	0.263679	0.0131543	6.99462	7.35896	-0.364346
		16929347	YWHAH	0.327131	0.0282086	7.67701	8.04125	-0.364238
		17063814	TRBV11-1	0.334168	0.0331186	8.27779	8.64066	-0.362864
		16919801	LOC100128591	0.270554	0.0123799	6.43207	6.79489	-0.362815
		16870667	GMIP	0.346201	0.0387306	8.37519	8.73796	-0.362773
		16872640	RABAC1	0.253057	0.0107147	8.42687	8.78957	-0.362692
		16674008	ZBTB37	0.263789	0.0121318	7.90289	8.26543	-0.362541
		17052767	TMEM139	0.252594	0.0121946	5.73479	6.09698	-0.362189
		17100109	LCN10	0.296705	0.0291159	5.80848	6.17046	-0.361979
		16789895	OR4K13	0.295865	0.0234083	4.06507	4.42683	-0.361754
		16741639	MIR3165	0.265519	0.012564	4.84585	5.2076	-0.361745
		16992957	FGFR4	0.207839	0.00708767	5.70755	6.06876	-0.361212
		16778390	RN7SKP2	0.305269	0.0332733	4.01992	4.38038	-0.360454
		16820254	C16orf86	0.304309	0.0270938	6.59124	6.95139	-0.360141
		16768291	OTTHUMG00000169910	0.255398	0.0343598	5.05318	5.41295	-0.359777
		16831442	TRPV2	0.225953	0.00807276	6.88723	7.24678	-0.359545
		16703934	ANKRD30A	0.243483	0.00696802	4.29355	4.65249	-0.358939
		16957766	ARHGAP31-AS1	0.190537	0.00389895	3.93348	4.29215	-0.358674
		16930768	SREBF2	0.318135	0.0267773	8.27747	8.63575	-0.358284
		16698200	CHIT1	0.334181	0.0426874	6.13135	6.4889	-0.35755
		17015814	JARID2-AS1	0.216416	0.00327121	4.94048	5.29755	-0.357074
		17001149	OTTHUMG00000163345	0.19324	0.00217742	5.97683	6.33345	-0.356613
		16673940	OTTHUMG00000034834	0.307943	0.0246638	5.63984	5.9962	-0.356367
		16983475	OTTHUMG00000161869	0.272784	0.0271722	4.54718	4.90342	-0.356239
		17062938	KLF14	0.229769	0.00553988	6.51902	6.87522	-0.356199
		16860374	RNA5SP470	0.259619	0.0106331	3.32659	3.68206	-0.355468
		16744785	PCSK7	0.222353	0.0037156	8.61374	8.96908	-0.35534
		17118364	LOC100129596	0.270224	0.0125993	6.63048	6.98522	-0.354738
		16823938	TXNDC11	0.352241	0.0364189	9.31495	9.66942	-0.354469
		17069467	BHLHE22	0.248346	0.011268	4.72179	5.07574	-0.353955
		16945456	ALG1L2	0.358162	0.0358907	5.67458	6.02824	-0.353659
		16675695	GPR25	0.243746	0.0295453	6.62128	6.97481	-0.353532
		16849355	TMC6	0.356269	0.0368944	7.79709	8.15015	-0.353053
		16706577	MBL1P	0.289548	0.01551	5.80572	6.15848	-0.352765
		16983792	OTTHUMG00000162000	0.327728	0.0322285	3.42068	3.77215	-0.351474
		16834179	EIF1	0.176486	0.00809841	10.9094	11.2608	-0.351413
		16850672	DLGAP1-AS5	0.277203	0.0327779	5.62545	5.97642	-0.350972
		16685374	SNIP1	0.175963	0.00133892	8.55439	8.90322	-0.348828
		17036054	B3GALT4	0.247759	0.0206955	7.83071	8.17913	-0.348423
		16848476	CPSF4L	0.303781	0.0188055	5.88211	6.22961	-0.347497
		16887237	DHRS9	0.255309	0.0138961	4.40112	4.74757	-0.346452
		16956691	CPOX	0.336118	0.0315768	7.25108	7.59707	-0.345993
		16818015	SNORA30	0.307893	0.0241517	5.69753	6.04324	-0.345715
		16746696	ADIPOR2	0.342933	0.0328758	7.59272	7.93781	-0.345096
		16970452	LOC285419	0.283233	0.0314486	4.99395	5.33893	-0.344978
		16845478	MPP2	0.178378	0.00112504	6.1446	6.48923	-0.344631
		17067696	NRG1	0.23585	0.0237109	6.14942	6.49394	-0.344514
		16704822	SLC18A3	0.250849	0.0269953	5.74484	6.08936	-0.344513
		16775418	TBC1D4-AS1	0.264653	0.0467934	3.90306	4.24738	-0.344324
		17066627	PPP3CC	0.321862	0.0272411	7.38158	7.72574	-0.344163
		16662322	GJB3	0.327659	0.0254354	5.90133	6.24508	-0.343749
		16832221	NOS2P3	0.253915	0.0200224	6.8347	7.1783	-0.343593
		16694361	ARHGEF2	0.343777	0.0406333	8.36855	8.71093	-0.342383
		17017947	TAP2	0.254069	0.0118904	8.15853	8.49998	-0.341448
		16768512	LOC643339	0.358602	0.0407219	5.11072	5.45165	-0.340937
		16827546	DPEP2	0.16732	0.000238982	7.16651	7.50717	-0.340662
		17014232	EZR-AS1	0.261203	0.0218579	5.37622	5.71661	-0.340394
		16924217	SAMSN1	0.248176	0.0332167	5.63634	5.97649	-0.340153
		17108953	VCX2	0.294338	0.0175179	7.69661	8.03551	-0.338904
		17070871	RBM12B-AS1	0.229867	0.0306358	5.22071	5.55871	-0.338002
		16729360	OMP	0.193206	0.00230369	6.52757	6.86519	-0.337622
		16675558	NEK7	0.363993	0.0415282	8.93686	9.27435	-0.337494
		17065223	OTTHUMG00000163630	0.247572	0.0197166	6.4641	6.80103	-0.336932
		16691879	PPIAL4G	0.379031	0.0432141	5.20518	5.54186	-0.336679
		17025666	RNASET2	0.35096	0.0350693	8.14392	8.48017	-0.336249
		16881770	LBX2	0.295781	0.0169817	6.14469	6.47972	-0.335034
		16787430	CALM1	0.28172	0.0144326	8.09412	8.4286	-0.334482
		17019077	TFEB	0.279912	0.0155527	6.27709	6.61096	-0.333866
		17091128	PAEP	0.383546	0.0448297	4.77242	5.10508	-0.332663
		16701632	OR2T27	0.38213	0.0468995	6.46467	6.79733	-0.332661
		17022422	MICAL1	0.314793	0.0405727	7.5248	7.8569	-0.332099
		17104578	FOXO4	0.366978	0.0419906	7.4895	7.82054	-0.331035
		16916270	PCMTD2	0.306732	0.0265961	6.28483	6.61294	-0.32811
		17061504	ATXN7L1	0.248017	0.00972413	8.03191	8.35966	-0.327747
		16733995	IRF7	0.261342	0.0101497	6.73176	7.05942	-0.327661
		17117790	SLC35G3	0.353339	0.0333656	6.49851	6.82608	-0.327579
		17031209	BRD2	0.342721	0.0315551	8.89653	9.22312	-0.326593
		16751251	DAZAP2	0.298698	0.0263402	9.7177	10.0443	-0.326549
		16732484	GRIK4	0.183856	0.00147523	6.16661	6.49314	-0.326532
		16720341	SNORA52	0.239576	0.0138398	7.60961	7.93594	-0.326328
		16721228	OR51B6	0.370319	0.0456241	4.81898	5.14211	-0.323133
		16739588	STX5	0.348499	0.0322673	8.39097	8.71345	-0.322489
		16754394	OTTHUMG00000169784	0.300618	0.0337362	7.47128	7.79299	-0.321712
		16856315	ARID3A	0.207025	0.00246445	7.87789	8.19947	-0.321581
		16827533	DPEP3	0.375479	0.0470621	6.35436	6.67333	-0.318968
		16814572	SOX8	0.321091	0.0494468	6.83957	7.15823	-0.318666
		16924349	TMPRSS15	0.289968	0.0201909	4.47888	4.79695	-0.318074
		17019103	PGC	0.26404	0.0172601	5.32717	5.64523	-0.318059
		16707541	CYP26A1	0.344147	0.0341902	5.14144	5.45929	-0.317844
		16836753	TBX4	0.34247	0.0297247	5.58309	5.90029	-0.317205
		16833189	SPACA3	0.193305	0.00209376	5.74252	6.05952	-0.317
		16844031	SNORA21	0.189972	0.0125433	6.90791	7.22446	-0.31655
		16876822	ID2	0.30508	0.0215408	7.51922	7.83558	-0.316366
		16825638	YPEL3	0.387926	0.0491045	8.65836	8.97393	-0.315562
		16767081	WIF1	0.173108	0.00101239	4.50915	4.82347	-0.314321
		16749336	SSPN	0.375507	0.0435629	6.09245	6.40579	-0.313333
		16816373	ABCC6P1	0.299201	0.030781	5.549	5.86166	-0.312659
		17012582	ARG1	0.192187	0.00171571	5.80402	6.11659	-0.312573
		16704397	FAM21C	0.277795	0.0146061	8.10451	8.41654	-0.312034
		16699209	USH2A	0.222883	0.0170428	5.74852	6.05933	-0.310807
		16709108	MXI1	0.377291	0.0422298	7.00563	7.31599	-0.310367
		17068867	SNTG1	0.263596	0.0301409	4.9789	5.28895	-0.310043
		16803623	ANKRD34C	0.277887	0.0149753	5.1013	5.41116	-0.309864
		16781606	ECRP	0.268503	0.0194752	5.82612	6.1355	-0.309382
		16757915	RNF10	0.229769	0.00521293	8.91442	9.22373	-0.309311
		17073577	MAF1	0.306086	0.0315482	8.05462	8.36311	-0.308489
		16950216	IL5RA	0.261023	0.0221635	5.35969	5.66727	-0.307581
		16772042	CCDC92	0.375675	0.0417373	8.12514	8.42992	-0.304779
		16786524	DLST	0.169071	0.000343556	8.2292	8.5333	-0.304096
		16734259	MOB2	0.321973	0.0349565	6.78814	7.09194	-0.3038
		16877941	KCNK3	0.222003	0.0114201	6.93249	7.23566	-0.303171
		17099581	SARDH	0.322014	0.0358248	7.08973	7.3927	-0.302978
		17057966	PHKG1	0.334539	0.0424354	6.36607	6.66877	-0.302701
		16850865	ANKRD12	0.300536	0.0485839	9.94882	10.251	-0.302182
		17049702	ZNHIT1	0.318606	0.0230176	8.33493	8.63708	-0.302145
		16739872	BAD	0.212952	0.00293703	7.63255	7.9342	-0.30165
		16681981	C1orf195	0.259925	0.0318083	5.13249	5.43365	-0.301165
		16793940	MIR4708	0.30152	0.0230513	5.80009	6.1009	-0.300807
		16995534	MIR3650	0.269048	0.0154435	8.03752	8.33833	-0.300804
		16848896	LOC100507191	0.24836	0.00764606	5.89478	6.1954	-0.300618
		17018186	RGL2	0.337693	0.0307039	8.66618	8.96612	-0.299941
[truncated: 335 more rows]
